1 Elevated human impact on islands increases the introduction and extinction status of native insular  
2 reptiles.

3

4 Jesse, Wendy A.M.\*<sup>1</sup>

5 Ellers, Jacintha<sup>1</sup>

6 Behm, Jocelyn E.<sup>2</sup>

7 Costa, Gabriel C.<sup>3</sup>

8 Hedges, S. Blair<sup>2</sup>

9 Helmus, Matthew R.<sup>2</sup>

10

11 \* Corresponding author

12

13 <sup>1</sup>Department of Ecological Science, Vrije Universiteit Amsterdam, De Boelelaan 1085

14 Amsterdam, NL 1081 HV

15 <sup>2</sup>Department of Biology, Temple University, 1925 N. 12th Street Suite 502, Philadelphia, PA

16 19122

17 <sup>3</sup>Department of Biology and Environmental Sciences, Auburn University at Montgomery,

18 Montgomery, AL, 36124, USA

1 **Elevated human impact on islands increases the introduction and extinction status of native**  
2 **insular reptiles**

3

4 **Abstract**

5 Species ranges are changing in the Anthropocene, the ranges of introduced species are expanding,  
6 while extinction-prone species are contracting. Introductions and extinctions are both caused by  
7 how species respond to human impacts, but it is unknown why the ranges of some species expand  
8 and some contract. Here, we test that this opposite response of human impact is due to introduced  
9 and extinction-prone species falling at opposite ends of geographic, evolutionary, or ecological  
10 trait continua. We constructed a database of native range maps, traits, phylogenetic relationships,  
11 and the introduction and extinction-prone status of squamate reptiles with ranges native to the  
12 Western Hemisphere. Across >3,000 snake and lizard species (88% of known native squamates),  
13 142 had been introduced elsewhere and 483 were extinction-prone (i.e., extinct, vulnerable,  
14 threatened). To explain variation in status, we first tested if the same human-impacted regions in  
15 the Americas contained the native ranges of species of either status. Second, we tested for  
16 phylogenetic signal in species status. Finally, we tested the explanatory power of multiple trait  
17 continua. The native ranges of introduced and extinction-prone reptiles were clustered in island  
18 regions with high human impact vs. mainland regions with lower human impact. Phylogenetic  
19 signal was weak for status, but introduced and extinction-prone species were clustered in different  
20 clades. All geographic and ecological traits that explained both statuses supported the opposite  
21 ends hypothesis. Introduced species had larger, edgier ranges, while extinction-prone species had  
22 smaller, simpler ranges. Introduced species were mostly herbivorous/omnivorous, while  
23 extinction-prone species were mostly carnivorous. Introduced species produced larger clutches,  
24 while extinction-prone species were smaller in body size. In the Anthropocene, the naive ranges of

25 introduced and extinction-prone species are in the same human-impacted regions where trait  
26 continua, having opposite effects, determine whether species ranges expand or contract in the  
27 continuing face of global change.

28

## 29 **Introduction**

30 In the Anthropocene, humans have altered species ranges and reassembled global biogeographic  
31 patterns that arose naturally across eons of evolution (Alroy 2015, Capinha et al. 2015, Ceballos et  
32 al. 2017). Range contraction and expansion varies across species due to human impact (Pacifiçi et  
33 al. 2020). However, the ultimate “winners” of the Anthropocene are introduced species, which  
34 expand into new geographic regions through human-driven dispersal and establishment (Colautti  
35 and MacIsaac 2004). While the “losers” are the extinct and threatened species that have  
36 experienced severe native range contraction due to human impacts like overharvesting, pollution,  
37 climate change, and land-use change (Vitousek et al. 1997, Sax and Gaines 2008, Böhm et al. 2013,  
38 Young et al. 2016). Most introductions and extinctions have occurred since the mid 20<sup>th</sup> Century,  
39 a period considered to be the start of the Anthropocene epoch where multiple indicators of human  
40 impact accelerated (IPBES 2019, 2023, Waters and Turner 2022).

41         The reasons for the opposite responses of introduced and extinction-prone species to human  
42 impact are multitiered. Species that get introduced to other regions often have native ranges that  
43 overlap with dense human populations increasing likelihood of intentional (e.g., pet trade) or  
44 unintentional (e.g., stowaways) human-aided dispersal (Latella et al. 2011, Liu et al. 2014, Su et  
45 al. 2016, Perella & Behm 2020). After introduction, species with suitable functional traits tend to  
46 be more successful in utilizing novel food sources and endure local climatic regimes (Mahoney et  
47 al. 2015, Monaco et al. 2020). In contrast, extinction-prone species generally are ecological  
48 specialists, characterized by narrow dietary and climatic niches and poor dispersal abilities due to

49 their geographic restriction to mountain tops, islands, or isolated nature reserves in a matrix of  
50 anthropogenic land use (Chichorro et al. 2019, Kotiaho et al. 2005, Böhm et al. 2016). Hence,  
51 introduced and extinction-prone species appear to be not only each other's antipodes in how they  
52 respond to human influence but also in many characteristics that could explain their opposite range  
53 responses in the Anthropocene. This raises the question if these winners and losers are at opposite  
54 ends of geographic, evolutionary, and ecological trait continua (Schmidt et al. 2021, Jeschke and  
55 Strayer 2008, Blackburn and Jeschke 2009). Testing this introduced-extinct opposite ends of the  
56 same trait continua hypothesis (also generically termed the two-sides-of-the-same-coin hypothesis  
57 in the literature) requires data on functional traits, native range characteristics, and geographic and  
58 phylogenetic clustering associated with introduced and extinction-prone species that are analyzed  
59 to determine the causes of dissimilarity between the two groups.

60         The studies that have tested the introduced-extinct opposite ends hypothesis show variable  
61 results. For instance, extinction-prone and successfully introduced plants (Bradshaw et al. 2008,  
62 Pandit et al. 2011, Schmidt et al. 2012), fish (Liu et al. 2017), mammals (Pacifci et al. 2020) and  
63 crayfish (Larson and Olden 2010) were on opposite extremes of the same trait axes such as body  
64 size, fecundity, longevity, genetic diversity, intraspecific trait variation, and habitat specialization.  
65 However, not all traits showed the opposite pattern. Other studies on birds and reptiles have found  
66 little evidence for the opposite-ends hypothesis even though different groups of traits characterized  
67 either extinction-prone or introduced species (Jeschke and Strayer 2008, Blackburn and Jeschke  
68 2009, Tingley et al. 2016, Marino & Bellard 2023). Furthermore, such comparative studies  
69 generally lack an (in-depth) phylogenetic perspective on species introduction and extinction  
70 probabilities, which is needed because nonoverlapping phylogenetic clustering of introduced and  
71 extinct species is expected under the hypothesis because many traits or characteristics of species  
72 exhibit phylogenetic signal (Schmidt et al. 2021). Moderate to strong levels of phylogenetic signal

73 have been found in traits associated with introduction and/or invasion success (Cadotte et al. 2009,  
74 Park and Potter 2015), native range size (Pigot et al. 2018), and fecundity (Allen et al. 2017,  
75 Yessoufou et al. 2016, Pyšek et al. 2017, Alcaraz et al. 2005, Su et al. 2016). Also, phylogenetic  
76 clustering of extinction-prone species has been detected in various taxa (Davies et al. 2011, Loza  
77 et al. 2017, Adeoba et al. 2019, Arbetman et al. 2017, Fritz and Purvis 2010, Tonini et al. 2016).  
78 Overall, there is compelling evidence that the predisposition to becoming introduced or extinct is  
79 phylogenetically clustered and should be considered when testing for the opposite ends hypothesis.

80         How species respond to human influence is assumed to be related to native geographic  
81 range characteristics associated with range expansions and contractions. Island-living may be an  
82 important characteristic determining species status. Islands have high human population densities  
83 and are subjected to disproportionate levels of human impact (Kier et al. 2009), thus insular species  
84 might be more likely to be introduced or go extinct than mainland species. Islands are hotspots of  
85 species loss (Myers et al. 2000, Mittermeier et al. 2011) and provide unique environments that  
86 select for functional traits that naturally determine major range expansions or contractions. Insular  
87 species have evolved through processes of oversea colonization, followed by often rapid adaptive  
88 diversification (Cowie and Holland 2006, Hedges 2006). Thus, insular species are selected to be  
89 efficient dispersers and quick adapters to available niche space, which could favor survival of  
90 human-vectored dispersal events (Poe et al. 2011). Indeed, post-introduction ecological niche shifts  
91 can occur for introduced species that originate from oceanic islands (Liu et al. 2014, Stroud 2021).  
92 However, island adaptive radiations may also cause island biota to be highly specialized, dispersal-  
93 limited, and extremely suited to exploit a narrow ecological niche within island environments  
94 (Losos 2009, Mahler et al. 2010, 2013). This level of specialization leaves island endemics  
95 sensitive to human-impact and thus prone to extinction (Jantz et al. 2015).

96 In this study, we used a phylogenetic comparative approach to identify dissimilarities in  
97 introduced and extinction-prone species characteristics. We built a dataset of 3111 squamate  
98 reptiles, which is 84% of all known lizards and snakes native to the Western Hemisphere (Fig. 1).  
99 We identified 142 species that had been introduced to at least one location somewhere in the world  
100 and 483 species threatened with extinction according to the International Union for the  
101 Conservation of Nature (IUCN 2021, Cox et al. 2022). Reptiles of the Americas are particularly  
102 suitable to test opposite responses to human influence, as reptiles are species-rich in the Western  
103 Hemisphere and are greatly impacted by human activities (Young et al. 2016, Jesse et al. 2018,  
104 Gleditsch et al. 2023). We asked: 1) Are islands of the Western Hemisphere disproportionate  
105 sources of introduced and sinks of extinction-prone species? 2) Can we detect phylogenetic signal  
106 among introduced and extinction-prone species? 3) For which geographic, evolutionary, and  
107 ecological trait continua are introduced and extinction-prone species positioned at opposite ends?

108

## 109 **Methods**

110

### 111 *Data compilation*

#### 112 Squamate phylogeny

113 We updated a global, smoothed, and interpolated phylogeny of squamates from the TimeTree of  
114 life project (Kumar et al. 2017), which contained 9378 worldwide species previously built in Marin  
115 et al. (2018) and Rapacciuolo et al. (2019). Species synonyms were identified and cleaned using  
116 the Reptile Database (Uetz, P., Freed, P. & Hošek 2012) to match up with IUCN native range  
117 polygons (see “Geographic data” below). Species not in the phylogeny and not in the spatial dataset  
118 were not analyzed. Specifically, the IUCN listed 3519 Western Hemisphere species of which 3463  
119 had native range distributions available. Intersecting the phylogeny with the range polygons,

120 resulted in a phylogeny of 3111 of species (Fig. 2, 88% of known Western Hemisphere species).  
121 We analyzed this subset of species for phylogenetic signal in introduced and extinction-prone  
122 status. Of these 3111 species, 2936 had IUCN native range maps and data on traits. We analyzed  
123 this subset of species in multivariable phylogenetic generalized linear models (PGLMM) to test if  
124 introduced and extinction-prone species fall at opposite ends of the same trait continua.

125

### 126 Species introduction and extinction-prone status

127 The response variables in our analyses were based on species statuses of squamates across the  
128 Western Hemisphere. We constructed a binomial variable to indicate whether a species was  
129 introduced anywhere on earth, and a response variable that indicated if a species was extinction-  
130 prone or not. To determine introduction status, we cross-referenced 3111 species from the  
131 phylogeny for which we had spatial native range data (see “Geographic data” below) with  
132 published invasive species databases, such as the Global Register of Introduced and Invasive  
133 Species, the Global Invasive Species Database, the Invasive Species Compendium, and others (e.g.,  
134 Powell et al. 2011, Mahoney et al. 2015, Tingley et al. 2016, Helmus et al. 2017, Behm et al. 2022;  
135 see Table S1 for the full list of references). For all species that did not match with these databases,  
136 we performed a Google query using the search term “*Species name* AND introduced OR exotic  
137 OR invasive OR alien OR nonnative OR non-indigenous” to look for species-specific literature.  
138 We excluded species for which introduction records were not scientifically published, uncertain,  
139 or debated. Extinction risk was taken from IUCN records (accessed August 2018). Species that  
140 were “vulnerable”, “endangered”, “critically endangered”, “extinct in the wild”, and “extinct” were  
141 all categorized as extinction-prone. Of the 3111 species, 349 of category “data deficient” and 494  
142 of category “not assessed” were excluded from the analyses (see “Analyses” below).

143

144 Geographic data

145 Distributional range maps for 3463 reptile species were compiled from the IUCN and Caribherp  
146 databases (Hedges 2021, IUCN 2021) and edited to only include polygon shapes of native ranges  
147 of squamates in the Western Hemisphere that also appeared in the phylogenetic tree. The resultant  
148 dataset included 3111 species. This difference in the number of species between datasets was  
149 caused by the mismatch between phylogeny and geographic ranges and removal of duplicate  
150 ranges, taxonomic synonyms, exotic ranges, and non-squamate species. We used these range  
151 polygons to calculate covariates (*italicized subheadings below*) for our statistical analyses.

152

153 *Range size and shape*

154 For each species, we calculated native range size and shape. Range size was estimated as range  
155 area in km<sup>2</sup>. Range shape was estimated as the inverse of the normalized perimeter of the range,  
156 which is calculated as range perimeter divided by the perimeter of a circle with the same area as  
157 the range (Patton 1975). While there are many metrics of range shape, most use some equation that  
158 includes a measure of range perimeter and area often expressed as a ratio (Krummel et al. 1987,  
159 Kupfer 2012). We chose normalized range perimeter (i.e., also termed edge diversity index,  
160 perimeter-area ratio shape index) because it is an intuitive metric indicative of range edginess  
161 versus compactness that is widely used and statistically independent of range size (Frazier and  
162 Kedron 2017). Values closer to one indicate ranges with many edges such as those that include  
163 multiple geographic boundaries. Values closer to zero are more compact and circular. Range size  
164 and shape were estimated with the “areaPolygon” (m<sup>2</sup>) and “perimeter” (m) functions from the  
165 geosphere R package (Hijmans 2019). We expected that a species is more likely to be introduced  
166 if it has a larger range with more edges. Larger ranges means there is more area for the species to  
167 hitchhike along transportation networks. Similarly, more edges means the species is distributed



168 across multiple islands, found near coastlines, in river valleys, and more people live near water  
169 (Small & Nicholls 2003). In contrast, we expected extinction-prone species to have small and  
170 simpler ranges, confined to a single or few populations.

171  
172 *Species insularity*  
173 For each species we calculated its level of insularity as the portion of a species range located on  
174 oceanic islands. We intersected species range polygons with a map of the continental mainland of  
175 North and South America (GADM 2018), enabling us to identify the mainland continental ranges  
176 for all species. Based on the area difference between the total species range and the continental  
177 range, we were able to infer the insular fraction of a species range. An insularity value of 1 indicates  
178 exclusive island living (i.e., island endemic) and values of 0 indicated that species only occur on  
179 the continental mainland. We expected both introduced and extinction-prone species to be native  
180 to islands because islands are highly populated and impacted by humans compared to the mainland.

181  
182 Evolutionary data  
183 *Genus age*  
184 Genus age was determined by calculating the branching-time from the most recent common  
185 ancestor of the genus (i.e., the stem age) with the ‘AssessMonophyly’ and ‘branching.time’  
186 functions (‘ape’ R package). Of 280 Western Hemisphere genera, 212 were monophyletic, 65 were  
187 monotypic (i.e., a genus containing one species) and three were paraphyletic (*Epicrates*, *Leposoma*,  
188 *Homonota*). The intruder or outlier clades in paraphyletic genera were all monophyletic or  
189 monotypic, thus the distribution of genus ages was unaffected. We expected genus age to positively  
190 associated with introduced status, and negatively associated with extinction-prone status because

191 of its observed relationship to niche volumes and range expansions (Davies et al. 2011, Title &  
192 Burns, 2015).

193  
194 *Evolutionary range expansion rate*

195 We summed the species range areas for all the species within the same genus to represent the  
196 cumulative range area that a genus has spread into since the time of divergence from the most  
197 recent common ancestor. Cumulative range area was divided by the focal genus age to calculate  
198 the average evolutionary range expansion rate of geographic spread for all species within a genus.  
199 We expected this metric to be negatively associated to extinction-prone status based on previous  
200 relationships found for reptiles (Title & Burns 2015), and positively associated with introduced  
201 status because squamate lineages that were successful colonizers of ancient Caribbean islands also  
202 tend to have more introduced species (Poe et al., 2011).

203  
204 Ecological data

205 *Functional traits*

206 We obtained data on functional traits hypothesized to be related to opposite distributional responses  
207 to human influence (Jeschke and Strayer 2008, Blackburn and Jeschke 2009, Tingley et al. 2016).  
208 Trait data were from Rapacciuolo et al. (2019). Specifically, we expected clutch size, viviparity,  
209 omnivory, and body size to be positively (negatively) associated with introduction (extinction-  
210 prone) status. Natural log-transformed values of clutch size and maximum body size, as well as  
211 two categorical variables for diet (herbivorous, carnivorous, and omnivorous) and reproductive  
212 mode (binomial: oviparous and (partially) viviparous), were included as independent variables in  
213 PGLMs.

214

215 *Seasonality and elevation*

216 We used a Principal Component Analysis (PCA) to extract composite variables that best explain  
217 the climatic variation experienced by species. First, we calculated the median of all 37 climatic  
218 variables in WorldClim and ENVIREM raster layers (30 arcsecond resolution, ca. 1km<sup>2</sup>) per  
219 species range (Fick and Hijmans 2017, Title and Bemmels 2018). Subsequently, we included all  
220 range medians in a scaled PCA in R, of which the first two principal components, together  
221 explaining 70% of median environmental variation, were selected. The first axis (PC1) aligned  
222 with climatic seasonality variables such as annual temperature range, diurnal temperature range,  
223 and seasonal variation in potential evapotranspiration, and the second axis (PC2) aligned with two  
224 elevation-derived variables from the ENVIREM dataset: terrain roughness and topographic  
225 wetness (indicative for the catchment of water in a watershed) (Title and Bemmels 2018; See Fig.  
226 S1). We expected extinction probability to be higher for species associated to isolated mountain  
227 ranges (e.g. Guirguis et al., 2023) and introduced species to be associated with seasonal climates  
228 with broad environmental tolerances (e.g. Tingley et al. 2016).

229

230 *Climatic niche differentiation*

231 We assessed the climatic variability in species ranges as indication of a species' adaptive capacity  
232 to various climatic regimes, expecting introduced species to have a high capacity and extinction-  
233 prone species to have a low capacity. We calculated the standard deviations of the 37 WorldClim  
234 and ENVIREM climatic variables per species range and included these in a scaled PCA. PC1 of  
235 this PCA (explaining 63% of all variation) was positively correlated to variability for all climatic  
236 variables (Fig. S2). Therefore, the PC1 score per species was taken as a value for climatic  
237 variability per species range, which was positively correlated with log-transformed range area ( $r =$   
238  $0.65$ ,  $t_{3054} = 47.45$ ,  $P < 0.001$ ), that is, species with large ranges experience high levels of climatic

239 variation. We used the residuals of this linear relationship to reflect climatic niche differentiation  
240 relative to a species range size.

241

## 242 Anthropogenic data

### 243 *Human footprint and number of ports*

244 As a general indicator of human impact within species ranges, we calculated the median human  
245 footprint for every species range (30 arcsecond resolution, ca. 1km<sup>2</sup>), which is a compilation of the  
246 amount of built environment, population density, agriculture, and several types of terrestrial and  
247 waterborne infrastructure (Venter et al. 2016). The median value was calculated across all pixels  
248 within each species range. We expected positive associations of human footprint with both  
249 introduced and extinction-prone status. We used the number of sea ports as a human impact  
250 indicator of propagule pressure to and from native ranges. Firstly, ports can serve as points of  
251 species export, positively affecting introduction status (Hulme, 2009). Number of ports in the  
252 native range also explains naturalization success of anole lizards (Latella et al. 2011). Secondly,  
253 ports can serve as points of entry of exotic species (Schneider et al., 2021), also promoting  
254 extinction-prone status, because native species become subjected to negative species interactions  
255 from these exotics. We determined the number of ports (incl. harbors, seaports, and major  
256 terminals) per native range area (World Port Index; National Geospatial-Intelligence Agency 2017)  
257 as a proxy for the level of seaborne trade to and from the species native range. Number of ports  
258 and human footprint index were not significantly correlated ( $r=-0.02$ ,  $t_{2988}=-0.98$ ,  $P=0.33$ ), and  
259 therefore both were included in the statistical analyses.

260

## 261 *Analyses*

262 All analyses were performed in R. We first asked if islands are sources of introduced species and  
263 sinks of extinction-prone species. We made maps of squamate species richness and proportions of  
264 introduced and extinction-prone richness in relation to total species richness using 1 km<sup>2</sup> grid cells.  
265 We then calculated the proportion of species with introduced or extinction-prone status whose  
266 ranges were found only on the mainland, mainland and islands, or only islands; and tested if species  
267 insularity explained introduced and extinction-prone status with chi-squared tests.

268         Second, we asked if there was phylogenetic signal among introduced and extinction-prone  
269 species indicating clustering in clades of species with similar status. The level of phylogenetic  
270 signal among introduced and extinction-prone species was determined with a metric D that tests  
271 for signal in binomial data (phylo.d in caper, Orme et al. 2013). We chose this metric because it  
272 exhibits statistically robust expectations for large trees when the proportion of species with a status  
273 value is low, like for our data (Fritz & Purvis 2010). The observed D value for introduced and  
274 extinction-prone species were each compared to two null distributions. First, to test if there was  
275 any phylogenetic signal in the data that is different from random and indicative of phylogenetic  
276 clustering, a distribution of 1000 random D values was generated under a null model permutation  
277 that randomized status values among species irrespective of the phylogeny. Second, to test the  
278 strength of clustering, a distribution of 1000 D values were generated from a null model that  
279 simulated status according to Brownian evolution across the phylogenetic tree. Observed D values  
280 different than the random null indicated clustering, while values that fell between the two  
281 distributions indicated weak clustering.

282         Finally, we tested the introduced-extinct opposite ends hypothesis by asking which  
283 geographic, evolutionary, and ecological trait continua explained introduction and extinction-prone  
284 status. The trait continua exhibited phylogenetic signal (Table S2), thus we used binomial  
285 phylogenetic generalized linear models (PGLMs) with logistic error term and Firth's penalized

286 likelihood correction (phyloglm in phylolm, Ho & Ane 2014). First, two separate PGLMs with  
287 introduction and extinction status as dependent variables were performed with range insularity as  
288 the sole independent factor, because of collinearity between insularity and other covariates (Fig.  
289 S3). All other covariates had relatively low levels of collinearity ( $r \leq |0.60|$  and  $VIF < 3.0$ ). Second,  
290 we ran two separate PGLMs with the other covariates not including insularity to test the hypothesis.  
291 Prior to all analyses, we scaled the covariates (mean = 0, sd = 1), so model estimates represented  
292 effect sizes.

293

## 294 **Results**

295 The native ranges of introduced and extinction-prone squamate species of the Western Hemisphere  
296 were often found on islands (Fig. 1). Across all species, 52% had native ranges only on the  
297 mainland, primarily Amazonia (Fig. 1A). In contrast, 91% of the introduced species were either  
298 island endemics (44%) or had islands in their native range (47%, Fig 1B), making islands key  
299 sources of introduced reptiles globally. Similarly, island endemics constituted 41% of the  
300 extinction-prone species (Fig. 1C). This clear overrepresentation of island endemics in introduced  
301 ( $\chi^2 = 47.83$ ,  $df = 1$ ,  $P < 0.001$ ) and extinction-prone reptile groups ( $\chi^2 = 164.67$ ,  $df = 1$ ,  $P < 0.001$ )  
302 indicates that islands are simultaneous sources and sinks of biodiversity in the Anthropocene.

303

304

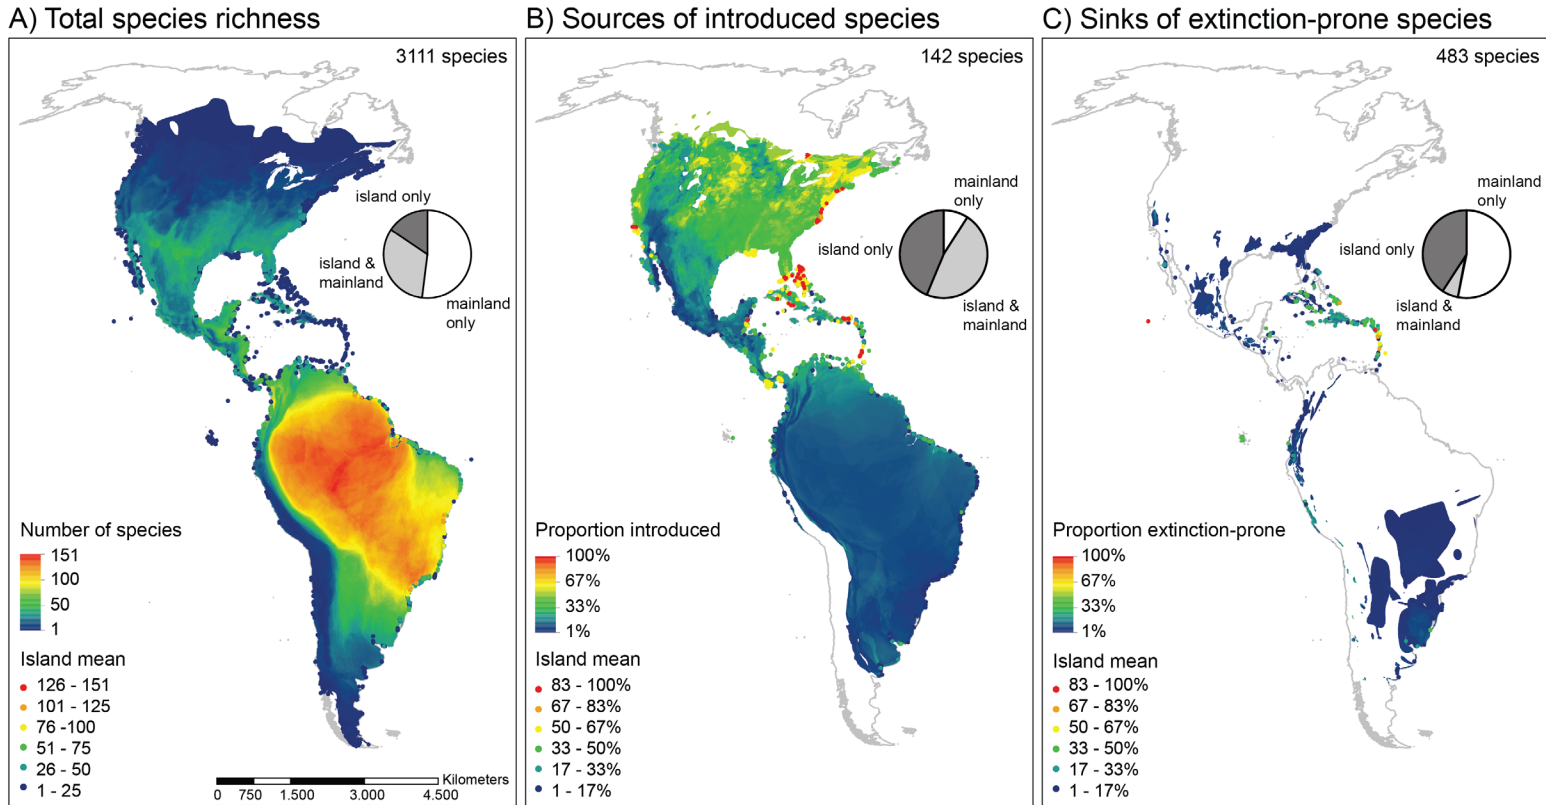

305 **Figure 1. The geographic clustering of the native ranges of introduced and extinction-prone**  
306 **American reptile species indicates islands as sources and sinks of Anthropocene biodiversity.**  
307 A) The total of overlapping native species ranges per 1km<sup>2</sup> grid cell provides a map of Western  
308 Hemisphere reptile species richness. The proportions of introduced (B) and extinction-prone (C)  
309 richness in relation to total species richness were calculated for all 1 km<sup>2</sup> grid cells inhabited by >1  
310 species. Points in all maps represent mean values per island and follow the same color scheme as  
311 the gridded layers. Pie charts represent the geographic context of the species ranges depicted in the  
312 respective maps, showing the proportions of species that are restricted to the continental mainland  
313 of North and South America (white), partially insular species that inhabit island and mainland areas  
314 (light grey), and species that are restricted to oceanic islands (dark grey). Percentages within pie  
315 charts are (clockwise, i.e., *mainland only*, *island and mainland*, *island only*) (A) 52%, 32%, 16%,

316 (B) 9%, 47%, 44%, (C) 53%, 6%, 41%. All maps were projected as Eckert IV spherical world  
317 projection in ESRI ArcMap 10.6.1.

318

319 Introduced and extinction-prone species were phylogenetically clustered across the  
320 phylogeny of Western Hemisphere reptiles (Fig 2). The signal for introduced ( $D = 0.63$ ) and  
321 extinction-prone ( $D = 0.71$ ) statuses both were  $D < 1$  ( $P < 0.001$ ) indicating that statuses more  
322 clustered than expected if statuses were randomly distributed across the phylogeny. However, both  
323 were  $D > 0$  ( $P < 0.001$ ). Zero is the  $D$  value expected under Brownian motion evolution of statuses;  
324 thus, the clade clustering of statuses was weak. Introduced and extinction-prone species came from  
325 different clades because the composition of the two groups showed little overlap. Of the 142  
326 introduced and 483 extinction-prone squamates, only 15 species were included in both categories.  
327 Of these 15 species, eight are popular species in the pet trade and threatened with extinction in their  
328 native range (e.g., *Cyclura* iguanas).

329

330



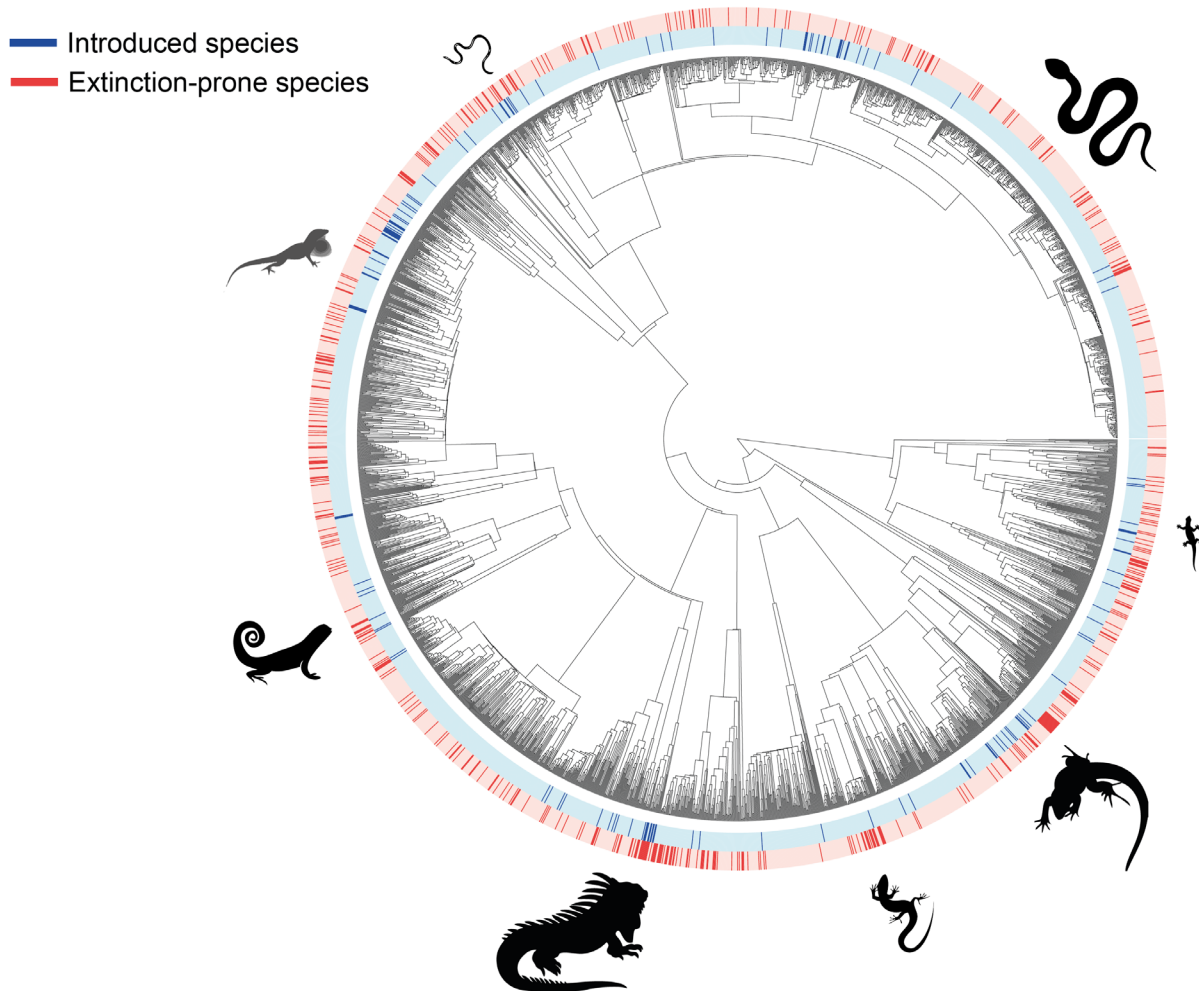

331  
332 **Figure 2. The phylogenetic clustering of introduced and extinction-prone status of American**  
333 **reptiles indicates they are not a random subset of all the reptiles that have evolved in the**  
334 **Western Hemisphere.** Introduced species (142) and extinction-prone species (483) are clustered  
335 across the Western Hemisphere squamate tree-of-life (3111 species total). Species with an  
336 introduced status were those with at least one population established outside of their native range  
337 in the Americas. Species with an extinction-prone status were categorized by the IUCN as  
338 “vulnerable”, “endangered”, “critically endangered”, “extinct in the wild”, and “extinct.”  
339 Silhouettes are of genera with clusters of introduced and/or extinction-prone species (clockwise:  
340 *Boa*, *Sphaerodactylus*, *Ameiva*, *Scincus*, *Iguana*, *Cnemidophorus*, *Anolis*, *Typhlops*). A metric of

341 phylogenetic signal that indicates clustering ( $D = 0$ ) or a random distribution ( $D = 1$ ) for introduced  
342 was  $D = 0.63$  ( $P < 0.001$  compared to both distributions) and for extinction-prone was  $D = 0.71$  ( $P$   
343  $< 0.001$ ).

344  
345 Range insularity was positively related to both introduction ( $0.39 \pm 0.08$ ,  $z = 4.45$ ,  $P <$   
346  $0.001$ ) and extinction probabilities ( $0.54 \pm 0.05$ ,  $z = 10.52$ ,  $P < 0.001$ ; Fig. 3A). Range insularity  
347 showed strong collinearity with other variables in our analyses, most prominently with range area  
348 ( $r = -0.39$ ,  $t = -23.3$ ,  $P < 0.001$ ), diet type (Kruskal-Wallis:  $\chi^2 = 18.2$ ,  $df = 2$ ,  $P < 0.001$ ; bias towards  
349 omnivory), and human footprint ( $r = 0.46$ ,  $t = 29.1$ ,  $df = 3056$ ,  $P < 0.001$ ) (see Fig. S3 for pairwise  
350 correlations). This indicates that island-living can be seen as a trait “syndrome”: a set of  
351 correlations among individual traits and species-level characteristics (e.g., Poe et al. 2011).  
352 Therefore, in our PGLM analyses range insularity was excluded from the set of trait continua used  
353 to test if introduced and extinction-prone species are positioned at opposite ends. After exclusion  
354 of range insularity from the models, human footprint was the only other explanatory variable that  
355 was positively related to introduction and extinction probability (Fig. 3B). The underlying cause  
356 of this is likely to be the significantly higher human footprint in species ranges located on oceanic  
357 islands than on the mainland ( $t = 22.03$ ,  $df = 653.79$ ,  $P < 0.001$ ; Fig. 3C), as well as in the ranges  
358 of introduced and extinction-prone species compared to other Western Hemisphere reptiles ( $t =$   
359  $3.76$ ,  $df = 145.41$ ,  $P < 0.001$  and  $t = 11.94$ ,  $df = 579.02$ ,  $P < 0.001$ , respectively; Fig. 3C).

360 All the trait continua that explained both statuses supported the opposite ends hypothesis  
361 (Fig. 3B). Native ranges of introduced species were larger ( $0.78 \pm 0.14$ ,  $z = 5.58$ ,  $P < 0.001$ ) and  
362 more edgy ( $0.74 \pm 0.12$ ,  $z = 6.32$ ,  $P < 0.001$ ). Extinction-prone ranges were smaller ( $-0.86 \pm 0.07$ ,  
363  $z = -12.64$ ,  $P < 0.001$ ) and relatively circular ( $-0.15 \pm 0.05$ ,  $z = -2.83$ ,  $P = 0.005$ ). Introduced and  
364 extinction-prone species had opposing diets. Introduced species were herbivorous ( $1.27 \pm 0.47$ ,  $z$

365 = 2.70,  $P = 0.007$ ) or omnivorous ( $0.68 \pm 0.28$ ,  $z = 2.39$ ,  $P = 0.02$ ) compared to carnivorous (i.e.,  
 366 carnivory was the contrast in the PGLMs). Conversely, extinction-prone species were carnivorous  
 367 rather than herbivorous ( $-2.19 \pm 0.41$ ,  $z = -5.37$ ,  $P < 0.001$ ) or omnivorous ( $-1.70 \pm 0.22$ ,  $z = -7.62$ ,  
 368  $P < 0.001$ ). Seven of the tested trait continua were uninformative, but two others explained a single  
 369 status (Fig 3B). As expected, introduced species had larger clutches ( $0.25 \pm 0.12$ ,  $z = -2.10$ ,  $P = 0.04$ ),  
 370 but unexpectedly, extinction-prone species were smaller ( $-0.11 \pm 0.04$ ,  $z = -2.63$ ,  $P = 0.008$ ).  
 371

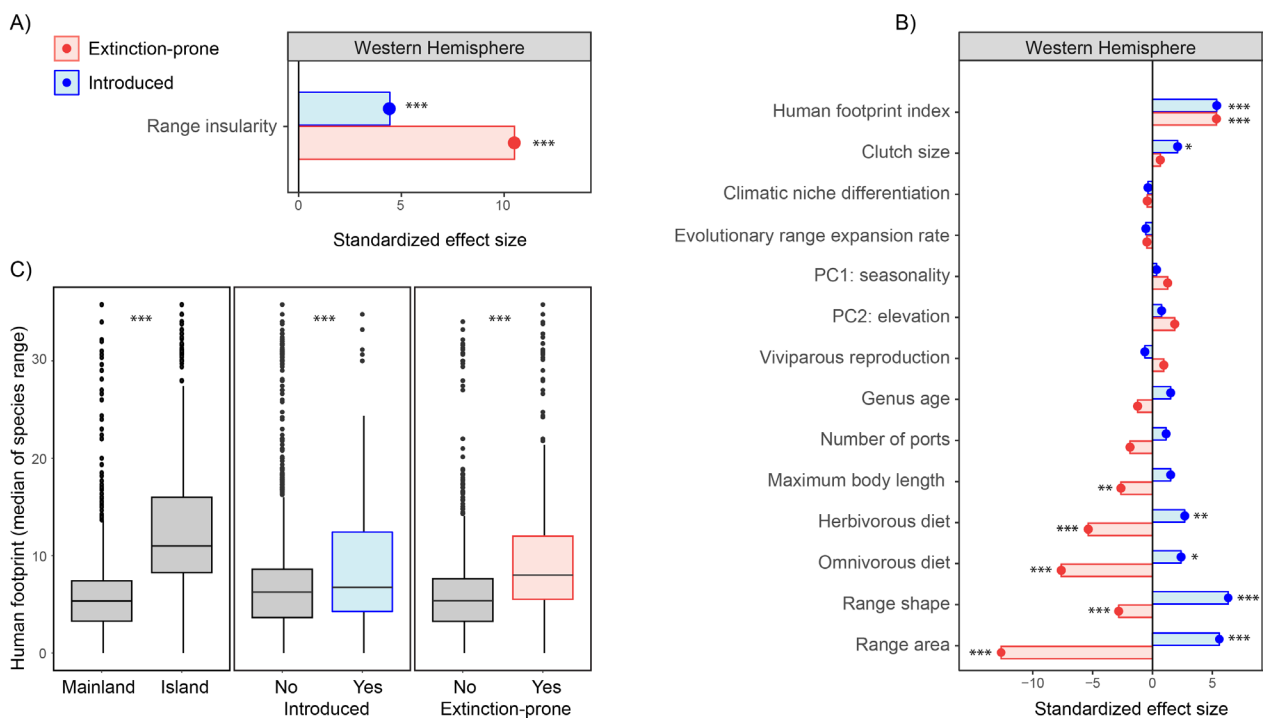

372  
 373 **Figure 3. Elevated human impact to islands increases introduction and extinction status of**  
 374 **insular lizards and snakes situated at opposite ends of trait continua.** A) Across Western  
 375 Hemisphere squamate reptiles, species with more insular ranges were more likely to be introduced  
 376 or extinction-prone. B) Species with introduced or extinction-prone status fell on opposite ends of  
 377 the trait continua that explained both statuses. C) The native ranges of island endemics (Island) are  
 378 more impacted by humans than continental species (Mainland), and the native ranges of species

379 with introduced or extinction-prone status are also more impacted. In A and C, range insularity was  
380 the proportion of a species native range found only on islands and ranged between 1 (island  
381 endemics, Island in C) and 0 (continental species, Mainland in C). In A and B, bars are standardized  
382 effect sizes (coefficient/SE). In A, separate univariate logistic PGLMMs for introduced or  
383 extinction-prone status were fit only to insularity. In B, separate multivariate PGLMMs were fit to  
384 a traits based on species geography, evolution, and ecology. In C, the three panels are box plots of  
385 the observed data and significance assessed with separate logistic PGLMMs on the data plotted in  
386 each panel ( $P < 0.05^*$ ,  $P < 0.01^{**}$ ,  $P < 0.001^{***}$ ).

387

## 388 **Discussion**

389 Islands contain the most human-dominated ecosystems on earth, and island living today  
390 impacts the status of native lizards and snakes across the Western Hemisphere. Our results suggest  
391 that native squamate species on islands have a higher likelihood of being either introduced or  
392 extinction-prone. We found that phylogeny predicted status, but the signal was weak. Instead,  
393 ecological and geographic trait continua best explained status. While species of either status were  
394 insular, trait continua oppositely affected introduction vs extinction risk of species to human  
395 impact. Below we discuss each of our major results. The results allow for a better understanding  
396 of range dynamics under global change and why highly impacted oceanic islands are simultaneous  
397 sources and sinks of biodiversity in the Anthropocene.

398

### 399 Insularity of introduced and extinction-prone species

400 Islands have consistently been found to have more established alien species than the  
401 mainland (e.g., Li et al. 2023). What we found here was that islands also generate more introduced

402 species than the mainland. In the Western Hemisphere, squamate species with the most insular  
403 native ranges were also most likely to be introduced elsewhere (Fig. 1B, 3A). Such a strong  
404 relationship has not been documented before to our knowledge, but we did find two relevant  
405 studies. First at the global scale, birds that have been introduced and birds that are extinction-prone  
406 due to invasive predatory species often have ranges that encompass islands (Marino & Bellard  
407 2023). However, this effect was weak for introduced birds and the authors only studied extinction-  
408 prone species impacted by invasives. Second, global spread rates of introduced herpetofauna  
409 species are not related to insularity (Liu et al. 2014). However, this study did not compare  
410 introduced vs. extinction-prone species and instead looked at how spread rate varied across  
411 continents and islands. In sum, insularity seems related to the probability a species is introduced,  
412 but not necessarily to how quickly an introduced species spreads.

413 Many of the extinction-prone squamates native to the Western Hemisphere were island  
414 endemics, and the more insular a species native range, the more likely it was to be extinction-prone  
415 (Fig. 1C, 3A). Globally, island regions are characterized by simultaneous high levels of endemism  
416 and extinction risk (Myers et al. 2000, Mittermeier et al. 2012). They are heavily impacted, and  
417 most extinctions have and are occurring on islands (Fernández-Palacios et al. 2021). Islands of the  
418 Western Hemisphere, like those in the Caribbean, are highly developed and connected by trade  
419 (Gleditsch et al. 2023). Thus, we should expect to see a similar influence of insularity on  
420 introduction and extinction-prone status for islands in the Eastern Hemisphere that are also highly  
421 impacted. The location of a species' native range and how heavily it is impacted by humans are  
422 key determinants of a species fate in the Anthropocene.

423

424 Introduced and extinction-prone species trait continua

425 We examined how native range characteristics, functional traits, and human impact  
426 influenced status, particularly focusing on range geography, evolutionary history, climate, diet, and  
427 life history traits. Human footprint in native ranges significantly raised the chances of a species  
428 being introduced or facing extinction, especially for island species (Fig. 3BC). However, we did  
429 not detect an association with our other metric of human impact, number of ports in the native  
430 range. This is surprising because trade increases propagule pressure of squamates and explains  
431 introduced squamates richness (Gleditsch et al. 2023, Mahoney et al. 2015). Port numbers may not  
432 well reflect trade pathways for squamates. The pet trade and live-plant trade are the major pathways  
433 for squamate introductions (e.g., Perella & Behm 2020). Estimates of the goods produced, and  
434 volume traded from within native ranges might better explain introduction and possibly extinction-  
435 prone status (Tingley et al. 2016).

436 Consistent with observations in other taxa (e.g., Pacifici et al. 2020), we found that the  
437 native range geography of squamates influences both introduction and extinction status. Introduced  
438 squamates generally had larger and edgier native ranges, indicative of spatially spread out and  
439 disjoint native distributions (Fig. 3B). In contrast, extinction-prone species had smaller and more  
440 compact native ranges. The IUCN often uses convex hulls to delineate ranges. This method can  
441 cause smaller ranges to be more circular and less edgy, and species with smaller ranges are more  
442 likely to be extinction-prone (IUCN 2021). In contrast, any species that has a large and edgier  
443 native range is more likely to encounter humans and be introduced by hitchhiking along  
444 transportation networks. Edgier ranges indicate abutment to coastlines and river valleys where most  
445 of humanity resides (Small & Nicholls 2003). Further, ancient colonization explains recent  
446 naturalizations of anole lizards and edgier ranges are also indicative of disjoint distributions derived  
447 from ancient long-distance natural colonization events (Poe et al. 2011).

448           The complexity of past and present climatic variation over which the macroevolutionary  
449 process has played out to determine the geography and ecology of Western Hemisphere squamate  
450 species says nothing about their status today. Climatic niche differentiation—an area standardized  
451 metric of the variation in climatic conditions within ranges—did not explain status. Evolutionary  
452 range expansion rate—an age standardized metric of how much area species of a genus have  
453 expanded into—also did not explain status. Similarly, current climatic conditions of native ranges  
454 had no effect on status. Neither did genus age. These negligible effects were unexpected. Measures  
455 of climate and evolutionary age do explain native range biodiversity for vertebrates globally,  
456 including Western Hemisphere squamates (e.g., Title and Burns 2015; Marin et al. 2018; Wiens et  
457 al. 2019). Thus, anthropogenetic changes to ranges are not influenced by current climate  
458 conditions, and how species ancestors adapted and responded to past climates. In the  
459 Anthropocene, there seems a decoupling of species macroevolutionary range histories from how  
460 species ranges are changing today.

461           Functional traits explained status. Squamate species with larger clutches—meaning those  
462 with higher reproductive potential—were often introduced. This result is consistent with theory on  
463 introduction establishment and vulnerability to stochastic events (Mahoney et al. 2015, Allen et al.  
464 2017). Unexpectedly, the reverse was not found. Extinction-prone species did not have smaller  
465 clutch size. Viviparous species were neither less-prone to extinction nor more likely to be  
466 introduced. The effect of clutch size on introductions is likely accentuated by the pet and wildlife  
467 trade (Li et al. 2023). Pet breeders focus on species who reproduce more, and pet introductions are  
468 a major invasion pathway for squamates (Perella & Behm 2020; Stringham & Lockwood 2018).  
469 Introduced squamates were more herbivorous and omnivorous than extinction prone squamates,  
470 which were small and carnivores (Fig. 3B). The positive association between non-carnivores and  
471 introduced status is congruent with a global study on reptiles that found herbivores most likely to

472 establish introduced populations (Mahoney et al. 2015), theoretical work that indicates diet  
473 generalism predicts invasion success (e.g., Romanuk et al. 2009), and studies of other taxa that find  
474 that species with range expansions often have generalist diets (e.g., Pacifici et al. 2020). For  
475 extinction-prone species, however, previous work has found that it is the large, herbivorous  
476 vertebrates most at risk of extinction, and for reptiles specifically it is the large, herbivorous turtles  
477 most at risk (Mahoney et al. 2015, Tingley et al. 2016, Atwood et al. 2020, Senior et al. 2021).  
478 Thus, there is variation in the extinction-size relationship across vertebrate clades. For squamates,  
479 those of small body size may be particularly sensitive to temperature shifts (Herczeg et al. 2007)  
480 making them vulnerable to human-caused microhabitat changes caused by land development (Jesse  
481 et al. 2018). Due to squamate invasion pathways, it is unsurprising that body size did not affect  
482 introduced status. Large squamates are often introduced as pets and smaller squamates introduced  
483 via the live plant trade (Powell et al. 2011). However, there is also likely variation in the  
484 relationship between squamate body size and introduction across clades (e.g., Latella et al. 2011).  
485 More work is needed to tease apart how specific ecological traits of different clades interact with  
486 specific invasion pathways and extinction drivers.

487

#### 488 Opposite ends of the same trait continua

489 The trait continua that explained both introduced and extinction-prone status all exhibited  
490 an opposite response (Fig 3B). While human footprint in native ranges increased both introduced  
491 and extinction-prone status, no geographic, evolutionary, or ecological trait explained statuses  
492 similarly. Two traits (clutch size, body size) explained only one of the statuses. Eight out of the 13  
493 traits we tested (ca. 60%) exhibited opposite responses that were either significant (herbivorous diet,  
494 omnivorous diet, range shape, range area) or weak (body size, number of ports, genus age,  
495 viviparity). Other studies also report opposite effect sizes for 50-73% of species-level predictors in



496 animal taxa (Jetschke & Strayer 2008, Blackburn & Jetschke 2009, Tingley et al. 2016). The  
497 support for the opposite ends hypothesis seems to find even stronger support in plant studies  
498 (Bradshaw et al. 2008, Pandit et al. 2011), although due to their different methodology, the strength  
499 of support for the hypothesis is difficult to compare among studies. We suggest a standardized  
500 metanalysis on existing studies to test if introduced and extinction-prone species do generally fall  
501 at opposite ends of the same trait continua. For Western Hemisphere squamates, there were strong  
502 positive associations of status with insularity and human footprint (Fig 3C). Therefore,  
503 dissimilarities in species characteristics alone do not provide a full understanding of what makes a  
504 species introduced or extinct. A tiered model is needed, in which the level of human impact in the  
505 native range of a species determines the likelihood of distributional change, while its ecological  
506 and geographic traits determine if the species will expand or contract.

507

#### 508 Implications for insular biodiversity

509 Islands have always served as important steppingstones for overwater dispersal and  
510 locations from which many colonizer species originated (e.g., Harbaugh et al. 2009). However,  
511 colonization and extinction rates greatly exceed historic background rates of species loss and gain.  
512 For instance, in Hawaii, the colonization rate before human settlement has been estimated at 0.03  
513 species per 1000 years, increasing to 20 species per 1000 years with the arrival of Polynesians and  
514 20000 species per 1000 years over the last two centuries (Ricciardi 2007). While oceanic islands  
515 are generally more susceptible to exotic invasion than mainland regions (Dawson et al. 2017), the  
516 level of colonization pressure on Hawaii in the last centuries is likely an extreme example.

517 The current rate of species introductions currently surpasses the rate of species extinctions  
518 (Ellis et al. 2012). In our dataset, only eight of 483 extinction-prone species were already  
519 considered extinct, while a total of 21% of species (483 out of 2268) were threatened with

520 extinction based on IUCN status. This threat level approximates results for all vertebrates, of which  
521 18% are at risk of extinction (Atwood et al. 2020) and 32% of terrestrial vertebrates experience  
522 range reduction or population decline (also including low concern species) (Ceballos et al. 2017).  
523 The discrepancy between extinct and threatened species numbers indicates the existence of an  
524 extinction debt: the surplus of species that will go extinct in the foreseeable future, but still  
525 contributes to the species richness we see today.

526         The swift influx of colonizers and prospective loss of endemic species leads to significant  
527 taxonomic and functional homogenization especially within island biota (Longman et al. 2018).  
528 This threatens biodiversity and ecosystem functioning on a small scale, but also poses a threat to  
529 global biodiversity because of the profound risk to lose a large portion of diversity on earth. To  
530 mitigate island homogenization, screening, biosecurity measures, and targeted protection policies  
531 must be better implemented on islands.

532

### 533 **Acknowledgements**

534

### 535 **References**

536 Adeoba, M., S. G. Tesfamichael, and K. Yessoufou. 2019. Preserving the tree of life of the fish

537 family Cyprinidae in Africa in the face of the ongoing extinction crisis. *Genome* 62:170–  
538 182.

539 Alcaraz, C., A. Vila-Gispert, and E. García-Berthou. 2005. Profiling invasive fish species: The  
540 importance of phylogeny and human use. *Diversity and Distributions* 11:289–298.

541 Allen, W. L., S. E. Street, and I. Capellini. 2017. Fast life history traits promote invasion success  
542 in amphibians and reptiles. *Ecology Letters* 2:222-230

543 Alroy, J. 2015. Current extinction rates of reptiles and amphibians. *Proceedings of the National*

- 544 Academy of Sciences of the United States of America 112:13003–13008.
- 545 Amiel, J. J., R. Tingley, and R. Shine. 2011. Smart moves: Effects of relative Brain size on  
546 Establishment success of invasive amphibians and reptiles. *PLoS ONE* 6:e18277.
- 547 Arbetman, M. P., G. Gleiser, C. L. Morales, P. Williams, and M. A. Aizen. 2017. Global decline  
548 of bumblebees is phylogenetically structured and inversely related to species range size and  
549 pathogen incidence. *Proceedings of the Royal Society B: Biological Sciences*  
550 284:20170204.
- 551 Atwood, T. B., S. A. Valentine, E. Hammill, D. J. McCauley, E. M. P. Madin, K. H. Beard, and  
552 W. D. Pearse. 2020. Herbivores at the highest risk of extinction among mammals, birds, and  
553 reptiles. *Science Advances* 6:eabb8458.
- 554 Behm, J., Busala, G. and Helmus, M. 2022. First records of three new lizard species and a range  
555 expansion of a fourth lizard species introduced to Aruba. *BioInvasions Records* 11:296–306.
- 556 Blackburn, T. M., and R. P. Duncan. 2001. Establishment patterns of exotic birds are constrained  
557 by non-random patterns in introduction. *Journal of Biogeography* 28:927-939.
- 558 Blackburn, T. M., and J. M. Jeschke. 2009. Invasion success and threat status: Two sides of a  
559 different coin? *Ecography* 32:83–88.
- 560 Böhm, M., B. Collen, J. E. M. Baillie, P. Bowles, J. Chanson, N. Cox, G. Hammerson, M.  
561 Hoffmann, S. R. Livingstone, M. Ram, A. G. J. Rhodin, S. N. Stuart, P. P. van Dijk, B. E.  
562 Young, L. E. Afuang, A. Aghasyan, A. García, C. Aguilar, R. Ajtic, F. Akarsu, L. R. V.  
563 Alencar, A. Allison, N. Ananjeva, S. Anderson, C. Andrén, D. Ariano-Sánchez, J. C.  
564 Arredondo, M. Auliya, C. C. Austin, A. Avci, P. J. Baker, A. F. Barreto-Lima, C. L. Barrio-  
565 Amorós, D. Basu, M. F. Bates, A. Batistella, A. Bauer, D. Bennett, W. Böhme, D. Broadley,  
566 R. Brown, J. Burgess, A. Captain, S. Carreira, M. del R. Castañeda, F. Castro, A. Catenazzi,  
567 J. R. Cedeño-Vázquez, D. G. Chapple, M. Cheylan, D. F. Cisneros-Heredia, D.

568 Cogalniceanu, H. Cogger, C. Corti, G. C. Costa, P. J. Couper, T. Courtney, J. Crnobrnja-  
569 Isailovic, P. A. Crochet, B. Crother, F. Cruz, J. C. Daltry, R. J. R. Daniels, I. Das, A. de  
570 Silva, A. C. Diesmos, L. Dirksen, T. M. Doan, C. K. Dodd, J. S. Doody, M. E. Dorcas, J.  
571 Duarte de Barros Filho, V. T. Egan, E. H. El Mouden, D. Embert, R. E. Espinoza, A.  
572 Fallabrino, X. Feng, Z. J. Feng, L. Fitzgerald, O. Flores-Villela, F. G. R. França, D. Frost, H.  
573 Gadsden, T. Gamble, S. R. Ganesh, M. A. Garcia, J. E. García-Pérez, J. Gatus, M. Gaulke,  
574 P. Geniez, A. Georges, J. Gerlach, S. Goldberg, J. C. T. Gonzalez, D. J. Gower, T. Grant, E.  
575 Greenbaum, C. Grieco, P. Guo, A. M. Hamilton, K. Hare, S. B. Hedges, N. Heideman, C.  
576 Hilton-Taylor, R. Hitchmough, B. Hollingsworth, M. Hutchinson, I. Ineich, J. Iverson, F. M.  
577 Jaksic, R. Jenkins, U. Joger, R. Jose, Y. Kaska, U. Kaya, J. S. Keogh, G. Köhler, G.  
578 Kuchling, Y. Kumlutaş, A. Kwet, E. La Marca, W. Lamar, A. Lane, B. Lardner, C. Latta, G.  
579 Latta, M. Lau, P. Lavin, D. Lawson, M. LeBreton, E. Lehr, D. Limpus, N. Lipczynski, A. S.  
580 Lobo, M. A. López-Luna, L. Luiselli, V. Lukoschek, M. Lundberg, P. Lymberakis, R.  
581 Macey, W. E. Magnusson, D. L. Mahler, A. Malhotra, J. Mariaux, B. Maritz, O. A. V.  
582 Marques, R. Márquez, M. Martins, G. Masterson, J. A. Mateo, R. Mathew, N. Mathews, G.  
583 Mayer, J. R. McCranie, G. J. Measey, F. Mendoza-Quijano, M. Menegon, S. Métrailler, D.  
584 A. Milton, C. Montgomery, S. A. A. Morato, T. Mott, A. Muñoz-Alonso, J. Murphy, T. Q.  
585 Nguyen, G. Nilson, C. Nogueira, H. Núñez, N. Orlov, H. Ota, J. Ottenwalder, T. Papenfuss,  
586 S. Pasachnik, P. Passos, O. S. G. Pauwels, N. Pérez-Buitrago, V. Pérez-Mellado, E. R.  
587 Pianka, J. Pleguezuelos, C. Pollock, P. Ponce-Campos, R. Powell, F. Pupin, G. E. Quintero  
588 Díaz, R. Radder, J. Ramer, A. R. Rasmussen, C. Raxworthy, R. Reynolds, N. Richman, E.  
589 L. Rico, E. Riservato, G. Rivas, P. L. B. da Rocha, M. O. Rödel, L. Rodríguez Schettino, W.  
590 M. Roosenburg, J. P. Ross, R. Sadek, K. Sanders, G. Santos-Barrera, H. H. Schleich, B. R.  
591 Schmidt, A. Schmitz, M. Sharifi, G. Shea, H. T. Shi, R. Shine, R. Sindaco, T. Slimani, R.

592 Somaweera, S. Spawls, P. Stafford, R. Stuebing, S. Sweet, E. Sy, H. J. Temple, M. F.  
593 Tognelli, K. Tolley, P. J. Tolson, B. Tuniyev, S. Tuniyev, N. üzüm, G. van Buurt, M. Van  
594 Sluys, A. Velasco, M. Vences, M. Veselý, S. Vinke, T. Vinke, G. Vogel, M. Vogrin, R. C.  
595 Vogt, O. R. Wearn, Y. L. Werner, M. J. Whiting, T. Wiewandt, J. Wilkinson, B. Wilson, S.  
596 Wren, T. Zamin, K. Zhou, and G. Zug. 2013. The conservation status of the world's reptiles.  
597 *Biological Conservation* 157:372–385.

598 Böhm, M., R. Williams, H. R. Bramhall, K. M. Mcmillan, A. D. Davidson, A. Garcia, L. M.  
599 Bland, J. Bielby, and B. Collen. 2016. Correlates of extinction risk in squamate reptiles: The  
600 relative importance of biology, geography, threat and range size. *Global Ecology and*  
601 *Biogeography* 25:391–405.

602 Bradshaw, C. J. A., X. Giam, H. T. W. Tan, B. W. Brook, and N. S. Sodhi. 2008. Threat or  
603 invasive status in legumes is related to opposite extremes of the same ecological and life-  
604 history attributes. *Journal of Ecology* 96:869–883.

605 Cadotte, M. W., M. A. Hamilton, and B. R. Murray. 2009. Phylogenetic relatedness and plant  
606 invader success across two spatial scales. *Diversity and Distributions* 15:481–488.

607 Capinha, C., F. Essl, H. Seebens, D. Moser, and H. M. Pereira. 2015. The dispersal of alien  
608 species redefines biogeography in the Anthropocene. *Science* 348:1248–1251.

609 Ceballos, G., P. R. Ehrlich, and R. Dirzo. 2017. Biological annihilation via the ongoing sixth  
610 mass extinction signaled by vertebrate population losses and declines. *Proceedings of the*  
611 *National Academy of Sciences of the United States of America* 114:E6089–E6096.

612 Chichorro, F., Juslén, A. & Cardoso, P. (2019). A review of the relation between species traits  
613 and extinction risk. *Biological Conservation*, 237:220–229.

614 Colautti, R. I., and H. I. MacIsaac. 2004. A neutral terminology to define “invasive” species.  
615 *Diversity and Distributions* 10:135–141.

- 616 Cowie, R. H., and B. S. Holland. 2006. Dispersal is fundamental to biogeography and the  
617 evolution of biodiversity on oceanic islands. *33*:193-198.  
618
- 619 Cox, N., Young, B.E., Bowles, P., Fernandez, M., Marin, J., Rapacciuolo, G., et al. (2022). A  
620 global reptile assessment highlights shared conservation needs of tetrapods. *Nature*, *605*:  
621 285–290.
- 622 Davies, T. J., G. F. Smith, D. U. Bellstedt, J. S. Boatwright, B. Bytebier, R. M. Cowling, F.  
623 Forest, L. J. Harmon, A. M. Muasya, B. D. Schrire, Y. Steenkamp, M. van der Bank, and V.  
624 Savolainen. 2011. Extinction risk and diversification are linked in a plant biodiversity  
625 hotspot. *PLoS Biology* *9*: e1000620.
- 626 Dawson, W., Moser, D., Van Kleunen, M., Kreft, H., Pergl, J., Pyšek, P., Weigelt, P., Winter, M.,  
627 Lenzner, B., Blackburn, T.M. and Dyer, E.E., 2017. Global hotspots and correlates of alien  
628 species richness across taxonomic groups. *Nature Ecology & Evolution* *1*:1-7.
- 629 Ellis, E. C., E. C. Antill, and H. Kreft. 2012. All is not loss: plant biodiversity in the  
630 Anthropocene. *PloS ONE* *7*:e30535.
- 631 Fernández-Palacios, J.M., Kreft, H., Irl, S.D.H., Norder, S., Ah-Peng, C., Borges, P.A.V., et al.  
632 2021. Scientists’ warning – The outstanding biodiversity of islands is in peril. *Global*  
633 *Ecology and Conservation* *31*:e01847.
- 634 Fick, S. E., and R. J. Hijmans. 2017. WorldClim 2: new 1-km spatial resolution climate surfaces  
635 for global land areas. *International Journal of Climatology* *37*:4302-4315.
- 636 Fordham, D. A., and B. W. Brook. 2010. Why tropical island endemics are acutely susceptible to  
637 global change. *Biodiversity and Conservation* *19*:392-342.
- 638 Frazier, A.E. & Kedron, P. (2017). Landscape metrics: past progress and future directions.  
639 *Current Landscape Ecology Reports*. *2*:63-72.

- 640 Fritz, S. A., and A. Purvis. 2010. Selectivity in mammalian extinction risk and threat types: A  
641 new measure of phylogenetic signal strength in binary traits. *Conservation Biology*  
642 24:1042–1051.
- 643 GADM. 2018. Database of Global Administrative Areas, version 3.6. The University of  
644 California, Berkley.
- 645 Gleditsch, J. M., Behm, J. E., Ellers, J., Jesse, W. A., & Helmus, M. R. 2023. Contemporizing  
646 island biogeography theory with anthropogenic drivers of species richness. *Global Ecology*  
647 *and Biogeography* 32:233-249.
- 648 Harbaugh, D. T., W. L. Wagner, G. J. Allan, and E. A. Zimmer. 2009. The Hawaiian Archipelago  
649 is a stepping stone for dispersal in the Pacific: an example from the plant genus *Melicope*  
650 (*Rutaceae*). *Journal of Biogeography* 36:230-241.
- 651 Hedges, S. B. 2006. An overview of the evolution and conservation of West Indian amphibians  
652 and reptiles. *Applied Herpetology* 3:281-292.
- 653 Hedges, S.B. 2021. *Caribherp: amphibians and reptiles of Caribbean Islands*. Available online at  
654 <http://www.caribherp.org/> (accessed 1 July 2021). Philadelphia, Pennsylvania: Temple  
655 University.
- 656 Helmus, M. R., J. E. Behm, A. M. Wendy, J. J. Kolbe, J. Ellers, and J. B. Losos. 2017. Exotics  
657 Exhibit More Evolutionary History Than Natives : A Comparison of the Ecology and  
658 Evolution of Exotic and Native Anole Lizards. *Invasion Genetics: The Baker and Stebbins*  
659 *Legacy* 122-138.
- 660 Herczeg, G., J. Török, and Z. Korsós. 2007. Size-dependent heating rates determine the spatial  
661 and temporal distribution of small-bodied lizards. *Amphibia Reptilia* 28:347–356.
- 662
- 663 Hijmans, R. J. 2019. *geosphere: Spherical Trigonometry*. R package version 1.5-10.

- 664 Ho, L.S.T. & Ane, C. 2014. A linear-time algorithm for Gaussian and non-Gaussian trait  
665 evolution models. *Systematic Biology* 63:397–408.
- 666 IPBES. 2019. Global assessment report on biodiversity and ecosystem services of the  
667 Intergovernmental Science-Policy Platform on Biodiversity and Ecosystem Services. E. S.  
668 Brondizio, J. Settele, S. Díaz, and H. T. Ngo (editors). IPBES secretariat, Bonn, Germany.  
669 1148 pages. <https://doi.org/10.5281/zenodo.3831673>.
- 670 IPBES. 2023. Summary for Policymakers of the Thematic Assessment Report on Invasive Alien  
671 Species and their Control of the Intergovernmental Science-Policy Platform on Biodiversity  
672 and Ecosystem Services. Roy, H. E., Pauchard, A., Stoett, P., Renard Truong, T., Bacher, S.,  
673 Galil, B. S., Hulme, P. E., Ikeda, T., Sankaran, K. V., McGeoch, M. A., Meyerson, L. A.,  
674 Nuñez, M. A., Ordonez, A., Rahlao, S. J., Schwindt, E., Seebens, H., Sheppard, A. W., and  
675 Vandvik, V. (eds.). IPBES secretariat, Bonn, Germany.  
676 <https://doi.org/10.5281/zenodo.7430692>.
- 677 IUCN Redlist. 2021. IUCN Redlist of Threatened Species. Available from  
678 <http://www.iucnredlist.org/> (accessed 1 July 2021). Gland, Switzerland: International Union  
679 for the Conservation of Nature.
- 680 Jantz, S. M., B. Barker, T. M. Brooks, L. P. Chini, Q. Huang, R. M. Moore, J. Noel, and G. C.  
681 Hurtt. 2015. Future habitat loss and extinctions driven by land-use change in biodiversity  
682 hotspots under four scenarios of climate-change mitigation. *Conservation Biology* 29:1122–  
683 1131.
- 684 Jeschke, J. M., and D. L. Strayer. 2008. Are threat status and invasion success two sides of the  
685 same coin? *Ecography* 31:124–130.
- 686 Jesse, W. A. M., J. E. Behm, M. R. Helmus, and J. Ellers. 2018. Human land use promotes the  
687 abundance and diversity of exotic species on Caribbean islands. *Global Change Biology*



- 688 24:4784–4796.
- 689 Kier, G., H. Kreft, T. M. Lee, W. Jetz, P. L. Ibsch, C. Nowicki, J. Mutke. and W. Barthlott.  
690 2009. A global assessment of endemism and species richness across island and mainland  
691 regions. *Proceedings of the National Academy of Sciences*, 106: 9322-9327.
- 692 Kotiaho, J. S., V. Kaitala, A. Komonen, and J. Päävinen. 2005. Predicting the risk of extinction  
693 from shared ecological characteristics. *Proceedings of the National Academy of Sciences of  
694 the United States of America* 102:1963–1967.
- 695 Krummel, J.R., Gardner, R.H., Sugihara, G., O’Neill, R.V. & Coleman, P.R. (1987). Landscape  
696 patterns in a disturbed environment. *Oikos* 48:321–324.
- 697 Kupfer, J.A. (2012). Landscape ecology and biogeography: Rethinking landscape metrics in a  
698 post-FRAGSTATS landscape. *Progress in Physical Geography: Earth and Environment*,  
699 36:400–420.
- 700 Kumar, S., G. Stecher, M. Suleski, and S. B. Hedges. 2017. TimeTree: A Resource for Timelines,  
701 Timetrees, and Divergence Times. *Molecular biology and evolution* 34:1812-1819.
- 702 Larson, E. R., and J. D. Olden. 2010. Latent extinction and invasion risk of crayfishes in the  
703 southeastern United States. *Conservation Biology* 24:1099–1110.
- 704 Latella, I. M., S. Poe, and J. T. Giermakowski. 2011. Traits associated with naturalization in  
705 *Anolis* lizards: Comparison of morphological, distributional, anthropogenic, and  
706 phylogenetic models. *Biological Invasions* 13:845–856.
- 707 Li, Y., Blackburn, T. M., Luo, Z., Song, T., Watters, F., Li, W., Deng, T., Luo, Z., Li, Y., Du, J.,  
708 Niu, M., Zhang, J., Zhang, J., Yang, J. and Wang, S. 2023. Quantifying global colonization  
709 pressures of alien vertebrates from wildlife trade. *Nat Commun* 14: 7914.
- 710 Liu, C., He, D., Chen, Y. and Olden, J. D. 2017. Species invasions threaten the antiquity of  
711 China’s freshwater fish fauna. *Diversity and Distributions* 23: 556–566.

- 712 Liu, X., X. Li, Z. Liu, R. Tingley, F. Kraus, Z. Guo, and Y. Li. 2014. Congener diversity,  
713 topographic heterogeneity and human-assisted dispersal predict spread rates of alien  
714 herpetofauna at a global scale. *Ecology Letters* 17:821–829.
- 715 Longman, E. K., K. Rosenblad, and D. F. Sax. 2018. Extreme homogenization: The past, present  
716 and future of mammal assemblages on islands. *Global Ecology and Biogeography* 27:77–95.
- 717 Losos, J. B. 2011. *Lizards in an Evolutionary Tree: Ecology and Adaptive Radiation of Anoles*.  
718 University of California Press.
- 719 Loza, M. I., I. Jiménez, P. M. Jørgensen, G. Arellano, M. J. Macía, V. W. Torrez, and R. E.  
720 Ricklefs. 2017. Phylogenetic patterns of rarity in a regional species pool of tropical woody  
721 plants. *Global Ecology and Biogeography* 26:1043-1054.
- 722 Mahler, D. L., T. Ingram, L. J. Revell, and J. B. Losos. 2013. Exceptional convergence on the  
723 macroevolutionary landscape in island lizard radiations. *Science* 341:292–295.
- 724 Mahler, D. L., L. J. Revell, R. E. Glor, and J. B. Losos. 2010. Ecological opportunity and the rate  
725 of morphological evolution in the diversification of greater Antillean anoles. *Evolution*  
726 64:2731–2745.
- 727 Mahoney, P. J., K. H. Beard, A. M. Durso, A. G. Tallian, A. L. Long, R. J. Kindermann, N. E.  
728 Nolan, D. Kinka, and H. E. Mohn. 2015. Introduction effort, climate matching and species  
729 traits as predictors of global establishment success in non-native reptiles. *Diversity and*  
730 *Distributions* 21:64–74.
- 731 MacArthur, R. H. and E.O. Wilson. 1967. *Island biogeography*. Princeton, USA.
- 732 Marin, J., G. Rapacciuolo, G. C. Costa, C. H. Graham, T. M. Brooks, B. E. Young, V. C.  
733 Radeloff, J. E. Behm, M. R. Helmus, and S. B. Hedges. 2018. Evolutionary time drives  
734 global tetrapod diversity. *Proceedings of the Royal Society B: Biological Sciences*  
735 285:20172378.

- 736 Marino, C. & Bellard, C. 2023. When origin, reproduction ability and diet define the role of birds  
737 in invasions. *Proc. R. Soc. B.* 290:20230196.
- 738 Mittermeier, R. A., Turner, W. R., Larsen, F. W., Brooks, T. M., & Gascon, C. (2011). Global  
739 biodiversity conservation: the critical role of hotspots. In *Biodiversity hotspots: distribution  
740 and protection of conservation priority areas* (pp. 3-22). Berlin, Heidelberg: Springer Berlin  
741 Heidelberg.
- 742 Monaco, C. J., C. J. A. Bradshaw, D. J. Booth, B. M. Gillanders, D. S. Schoeman, and I.  
743 Nagelkerken. 2020. Dietary generalism accelerates arrival and persistence of coral-reef  
744 fishes in their novel ranges under climate change. *Global Change Biology* 26:5564-5573.
- 745 Myers, N., R. A. Mittermeyer, C. G. Mittermeyer, G. A. B. Da Fonseca, and J. Kent. 2000.  
746 Biodiversity hotspots for conservation priorities. *Nature* 403:853–858.
- 747 National Geospatial-Intelligence Agency. 2017. World Port Index.  
748 <https://msi.nga.mil/Publications/WPI>.
- 749 Orme, D., Freckleton, R., Thomas, G., Petzoldt, T., Fritz, S., Isaac, N., & Pearse, W. 2013. The  
750 caper package: comparative analysis of phylogenetics and evolution in R. R package version  
751 5:1-36.
- 752 Pandit, M. K., M. J. O. Pocock, and W. E. Kunin. 2011. Ploidy influences rarity and invasiveness  
753 in plants. *Journal of Ecology* 99:1108-1115.
- 754 Park, D. S., and D. Potter. 2015. Why close relatives make bad neighbours: Phylogenetic  
755 conservatism in niche preferences and dispersal disproves Darwin’s naturalization  
756 hypothesis in the thistle tribe. *Molecular Ecology* 24:3181–3193.
- 757 Patton, D. R. 1975. A diversity index for quantifying habitat “edge”. *Wildlife Society Bulletin*  
758 (1973-2006). 3:171-173.
- 759 Perella, C. D. and Behm, J. E. 2020. Understanding the spread and impact of exotic geckos in the

- 760 greater Caribbean region. *Biodivers Conserv* 29:1109–1134.
- 761 Perry, G., Razi Dmi'el, & Lazell, J. 1999. Evaporative Water Loss in Insular Populations of the  
762 *Anolis cristatellus* Group (Reptilia: Sauria) in the British Virgin Islands II: The Effects of  
763 Drought. *Biotropica* 31:337–343.
- 764 Pigot, A. L., E. E. Dyer, D. W. Redding, P. Cassey, G. H. Thomas, and T. M. Blackburn. 2018.  
765 Species invasions and the phylogenetic signal in geographical range size. *27*:1080-1092.
- 766 Poe, S., J. T. Giermakowski, I. Latella, E. W. Schaad, E. P. Hulebak, and M. J. Ryan. 2011.  
767 Ancient colonization predicts recent naturalization in anolis lizards. *Evolution* 65:1195–  
768 1202.
- 769 Powell, R., Henderson, R. W., Farmer, M. C., Breuil, M., Echternacht, A. C., Van Buurt, G., ... &  
770 Perry, G. (2011). Introduced amphibians and reptiles in the Greater Caribbean: Patterns and  
771 conservation implications. In *Conservation of Caribbean Island herpetofaunas volume 1:*  
772 *conservation biology and the wider Caribbean* (pp. 63-143). Brill. Pyšek, P., J. Pergl, F.  
773 Essl, B. Lenzner, W. Dawson, H. Kreft, P. Weigelt, M. Winter, J. Kartesz, M. Nishino, L. A.  
774 Antonova, J. F. Barcelona, F. J. Cabezas, D. Cárdenas, J. Cárdenas-Toro, N. Castaño, E.  
775 Chacón, C. Chatelain, S. Dullinger, A. L. Ebel, E. Figueiredo, N. Fuentes, P. Genovesi, Q. J.  
776 Groom, L. Henderson, Inderjit, A. Kupriyanov, S. Masciadri, N. Maurel, J. Meerman, O.  
777 Morozova, D. Moser, D. Nickrent, P. M. Nowak, S. Pagad, A. Patzelt, P. B. Pelsler, H.  
778 Seebens, W. S. Shu, J. Thomas, M. Velayos, E. Weber, J. J. Wieringa, M. P. Baptiste, and  
779 M. Van Kleunen. 2017. Naturalized alien flora of the world: Species diversity, taxonomic  
780 and phylogenetic patterns, geographic distribution and global hotspots of plant invasion.  
781 *Preslia* 89:203-274.
- 782 Rapacciuolo, G., C. H. Graham, J. Marin, J. E. Behm, G. C. Costa, S. B. Hedges, M. R. Helmus,  
783 V. C. Radeloff, B. E. Young, and T. M. Brooks. 2019. Species diversity as a surrogate for

- 784 conservation of phylogenetic and functional diversity in terrestrial vertebrates across the  
785 Americas. *Nature Ecology and Evolution* 3:53–61.
- 786 Ricciardi, A. 2007. Are modern biological invasions an unprecedented form of global change?  
787 *Conservation Biology*. 21:329:336
- 788 Romanuk, T. N., Y. Zhou, U. Brose, E. L. Berlow, R. J. Williams, and N. D. Martinez. 2009.  
789 Predicting invasion success in complex ecological networks. *Philosophical Transactions of*  
790 *the Royal Society B: Biological Sciences* 364:1743-1754.
- 791 Salazar JC, Del Rosario Castañeda M, Londoño GA, Bodensteiner BL, Muñoz MM. 2019.  
792 Physiological evolution during adaptive radiation: A test of the island effect in *Anolis*  
793 lizards. *Evolution* 73:1241-1252.
- 794 Sax, D. F., and S. D. Gaines. 2008. Species invasions and extinction: The future of native  
795 biodiversity on islands. *Proceedings of the National Academy of Sciences of the United*  
796 *States of America* 105:11490–11497.
- 797 Sayol, F., Cooke, R.S.C., Pigot, A.L., Blackburn, T.M., Tobias, J.A., Steinbauer, M.J., et al.  
798 2021. Loss of functional diversity through anthropogenic extinctions of island birds is not  
799 offset by biotic invasions. *Science Advances*, 7:eabj5790.
- 800 Schmidt, J. P., P. R. Stephens, and J. M. Drake. 2012. Two sides of the same coin Rare and pest  
801 plants native to the United States and Canada. *Ecological Applications* 22:1512–1525.
- 802 Schmidt, J.P., Davies, T.J. & Farrell, M.J. 2021. Opposing macroevolutionary and trait-mediated  
803 patterns of threat and naturalisation in flowering plants. *Ecology Letters* 24:1237–1250.
- 804 Senior, A. F., Böhm, M., Johnstone, C. P., McGee, M. D., Meiri, S., Chapple, D. G., & Tingley,  
805 R. 2021. Correlates of extinction risk in Australian squamate reptiles. *Journal of*  
806 *Biogeography* 48:2144-2152.
- 807 Small, C. & Nicholls, R.J. (2003). *A Global Analysis of Human Settlement in Coastal Zones.*

- 808 Journal of Coastal Research 19:584–599.
- 809 Smith, K. G., and R. J. Almeida. 2020. When are extinctions simply bad luck? Rarefaction as a  
810 framework for disentangling selective and stochastic extinctions. *Journal of Applied*  
811 *Ecology* 57:101-110.
- 812 Spatz, D. R., K. M. Zilliacus, N. D. Holmes, S. H. M. Butchart, P. Genovesi, G. Ceballos, B. R.  
813 Tershy, and D. A. Croll. 2017. Globally threatened vertebrates on islands with invasive  
814 species *Science Advances* 3: e1603080.
- 815 Stringham, O. C. and J. L. Lockwood. 2018. Pet problems: biological and economic factors that  
816 influence the release of alien reptiles and amphibians by pet owners. *Journal of Applied*  
817 *Ecology* 55:2632-2640.
- 818 Stroud, J. T. 2021. Island species experience higher niche expansion and lower niche  
819 conservatism during invasion. *Proceedings of the National Academy of Sciences*  
820 118:e2018949118.
- 821 Su, S., P. Cassey, and T. M. Blackburn. 2016. The wildlife pet trade as a driver of introduction  
822 and establishment in alien birds in Taiwan. *Biological Invasions* 18:215-229.
- 823 Tingley, R., P. J. Mahoney, A. M. Durso, A. G. Tallian, A. Morán-Ordóñez, and K. H. Beard.  
824 2016. Threatened and invasive reptiles are not two sides of the same coin. *Global Ecology*  
825 *and Biogeography* 25:1050-1060.
- 826 Title, P. O., and J. B. Bemmels. 2018. ENVIREM: an expanded set of bioclimatic and  
827 topographic variables increases flexibility and improves performance of ecological niche  
828 modeling. *Ecography* 41:291-307.
- 829 Title, P. O., and K. J. Burns. 2015. Rates of climatic niche evolution are correlated with species  
830 richness in a large and ecologically diverse radiation of songbirds. *Ecology Letters* 18:433–  
831 440.

- 832 Tonini, J. F. R., Beard, K. H., Ferreira, R. B., Jetz, W., & Pyron, R. A. 2016. Fully-sampled  
833 phylogenies of squamates reveal evolutionary patterns in threat status. *Biological*  
834 *Conservation* 204:23-31.
- 835 Uetz, P., Freed, P., Aguilar, R., Reyes, F., Kudera, J. & Hošek, J. (Eds.). 2021. The Reptile  
836 Database, <http://www.reptile-database.org>.
- 837 Venter, O., E. W. Sanderson, A. Magrath, J. R. Allan, J. Beher, K. R. Jones, H. P. Possingham,  
838 W. F. Laurance, P. Wood, B. M. Fekete, M. A. Levy, and J. E. M. Watson. 2016. Global  
839 terrestrial Human Footprint maps for 1993 and 2009. *Scientific Data* 3:160067.
- 840 Vitousek, P. M., H. A. Mooney, J. Lubchenco, and J. M. Melillo. 1997. Human domination of  
841 Earth's ecosystems. *Science* 277:494–499.
- 842 Waters, C.N. & Turner, S.D. 2022. Defining the onset of the Anthropocene. *Science*, 378, 706–  
843 708.
- 844 Wiens, J. J., Y. Litvinenko, L. Harris, and T. Jezkova. 2019. Rapid niche shifts in introduced  
845 species can be a million times faster than changes among native species and ten times faster  
846 than climate change. *Journal of Biogeography* 46:2115-2125.
- 847 Yessoufou, K., K. Mearns, H. O. Elansary, and G. H. Stoffberg. 2016. Assessing the  
848 phylogenetic dimension of Australian Acacia species introduced outside their native ranges.  
849 *Botany Letters* 163:33–39.
- 850 Young, H. S., D. J. McCauley, M. Galetti, and R. Dirzo. 2016. Patterns, Causes, and  
851 Consequences of Anthropocene Defaunation. *Annual Review of Ecology, Evolution, and*  
852 *Systematics* 47:333–358.
- 853

## Appendix

**Table S1** list of references used to estimate the introduction status of Western Hemisphere squamates.

1. Allen, W. L., Street, S. E., & Capellini, I. (2017). Fast life history traits promote invasion success in amphibians and reptiles. *Ecology Letters*, 20(2), 222-230.
2. Ascensão, F., D'Amico, M., Martins, R. C., Rebelo, R., Barbosa, A. M., Bencatel, J., ... & Capinha, C. (2021). Distribution of alien tetrapods in the Iberian Peninsula. *NeoBiota*, 64, 1.
3. Behm, J. E., Buurt, G. van (Gerard), DiMarco, B. M., Ellers, J., Irian, C. G., Langhans, K. E., McGrath, K., Tran, T. and Helmus, M. 2018. First records of the mourning gecko (*Lepidodactylus lugubris* Duméril and Bibron, 1836), common house gecko (*Hemidactylus frenatus* in Duméril, 1836), and Tokay gecko (*Gekko gekko* Linnaeus, 1758) on Curaçao, Dutch Antilles, and remarks on their Caribbean distributions. - *BioInvasions Records* 8: 34–44.
4. Roy D, Alderman D, Anastasiu P, Arianoutsou M, Augustin S,...& Reysers L (2020). DAISIE - Inventory of alien invasive species in Europe. Version 1.7. Research Institute for Nature and Forest (INBO). Checklist dataset <https://doi.org/10.15468/ybwd3x> accessed via GBIF.org on 2021-06-14.
5. European Network on Invasive Alien Species. 2018. NOBANIS - Gateway to information on Invasive Alien Species in North and Central Europe.
6. European Network on Invasive Alien Species. 2018. NOBANIS - Gateway to information on Invasive Alien Species in North and Central Europe. <https://www.nobanis.org/>
7. Ficetola, G. F., and S. Scali. 2010. Invasive amphibians and reptiles in Italy. *VIII Congresso Nazionale Societas Herpetologica Italica*:335–340



8. Florida Fish and Wildlife Conservation Commission (2018).  
<https://myfwc.com/wildlifehabitats/nonnatives/reptiles/>
9. Helmus, M. R., J. E. Behm, A. M. Wendy, J. J. Kolbe, J. Ellers, and J. B. Losos. 2017. Exotics Exhibit More Evolutionary History Than Natives : a Comparison of the Ecology and Evolution of Exotic and Native Anole Lizards. *Invasion Genetics: The Baker and Stebbins Legacy*.
10. Invasive Species Specialist Group ISSG 2015. The Global Invasive Species Database. Version 2015.1
11. Kraus, F. 2009. Appendix A : Database of Introductions. *Alien Reptiles and Amphibians: A Scientific Compendium and Analysis*:133–369
12. Liu, X., X. Li, Z. Liu, R. Tingley, F. Kraus, Z. Guo, and Y. Li. 2014. Congener diversity, topographic heterogeneity and human-assisted dispersal predict spread rates of alien herpetofauna at a global scale. *Ecology Letters* 17:821–829.
13. Maclean, W. P., R. Kellner, and H. Dennis. 1977. Island lists of West Indian amphibians and reptiles. *Smithsonian Herpetological Information Service* 51:1-47.
14. National Insitute for Environmental Studies. NIES. (2018) *Invasive Species of Japan*.  
[https://www.nies.go.jp/biodiversity/invasive/index\\_en.html](https://www.nies.go.jp/biodiversity/invasive/index_en.html)
15. Pagad, S., P. Genovesi, L. Carnevali, D. Schigel, and M. A. McGeoch. 2018. Data Descriptor: Introducing the Global Register of Introduced and Invasive Species
16. Powell, R. (2006). Conservation of the herpetofauna on the Dutch Windward Islands: St. Eustatius, Saba, and St. Maarten. *Applied Herpetology*, 3(4), 293-306.
17. Powell, R., & Henderson, R. W. (Eds.). (2012). *Island lists of West Indian amphibians and reptiles*.

18. Soorae, P. S., Al Quarqaz, M., & Gardner, A. S. (2010). An overview and checklist of the native and alien herpetofauna of the United Arab Emirates. *Herpetological Conservation and Biology*, 5(3), 529-536.
19. SSAR North American Species Names Database (2018). <https://ssarherps.org/cndb/>
20. Tingley, R., P. J. Mahoney, A. M. Durso, A. G. Tallian, A. Morán-Ordóñez, and K. H. Beard. 2016. Threatened and invasive reptiles are not two sides of the same coin. *Global Ecology and Biogeography* 25
21. United States Governmental Survey. 2018. Nonindigenous Aquatic species. <https://nas.er.usgs.gov/queries/SpeciesList.aspx?group=Reptiles&size=50&sortBy=1&status=0&fmb=0&pathway=0&stcolist=All%20--%20All>
22. van Buurt, G. (2006). Conservation of amphibians and reptiles in Aruba, Curaçao and Bonaire.
23. van Buurt, G., & Debrot, A. O. (2011). Exotic and invasive terrestrial and freshwater animal species in the Dutch Caribbean (No. C001/12). IMARES.
24. Van Wilgen, N. J., Richardson, D. M., & Baard, E. H. (2008). Alien reptiles and amphibians in South Africa: towards a pragmatic management strategy. *South African Journal of Science*, 104(1-2), 13-20.

A)

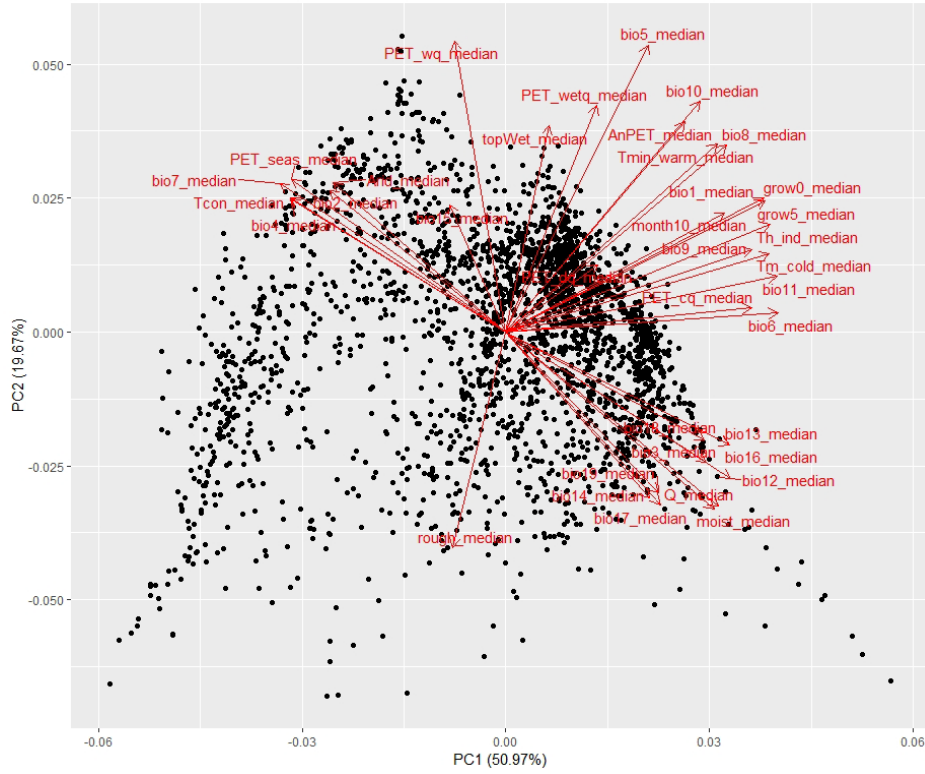

B)

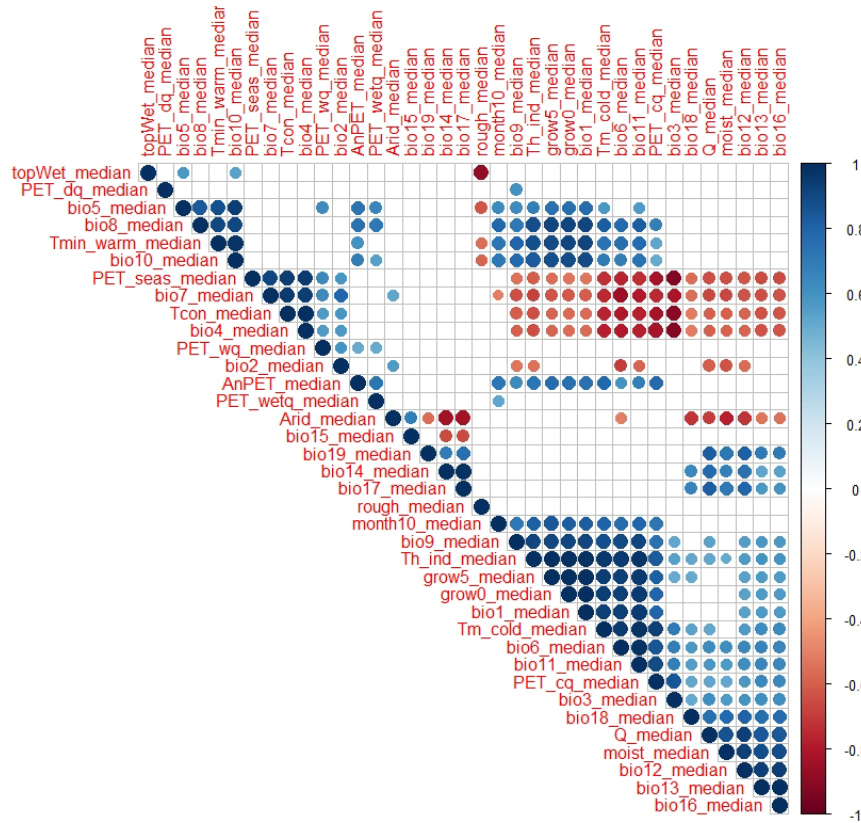

**Figure S1.** Biplot and correlation matrix including all 37 climatic variables from Woldclim (Fick et al., 2017) and ENVIREM (Title & Bemmels, 2018) databases, which were included a scaled Principal Component Analysis (PCA). From this PCA, two environmental PC axes were derived and included in further analysis. A) Biplot of axis 1 (PC1) and axis 2 (PC2) of a PCA that shows the variation among the median values of 37 climatic variables in 3061 species ranges. 1 point is 1 species range. PC1 aligns with variables indicating the level of seasonality within a species range (e.g., temperature seasonality; continentality and temperature range, negatively correlated to temperature in the coldest month). PC2 aligns with variables associated with elevational differences (e.g., terrain roughness index; SAGA-GIS topographic wetness index). We inverted both axes compared to the rotation depicted here. B) Correlation matrix of 37 WorldClim and ENVIREM variables for which the median per species range has been calculated. The variables are ordered to maximize congruence. Correlation coefficients  $> -0.5$  and  $< 0.5$  were excluded from this figure for clarity. Dot size indicates the strength of the correlations; the larger the dot, the closer the correlation coefficient is to 1 or  $-1$ . Blue dots indicate a positive correlation and red dots indicate a negative correlation among variables, and thus a parallel or opposite direction of the arrows in figure S1A, respectively.

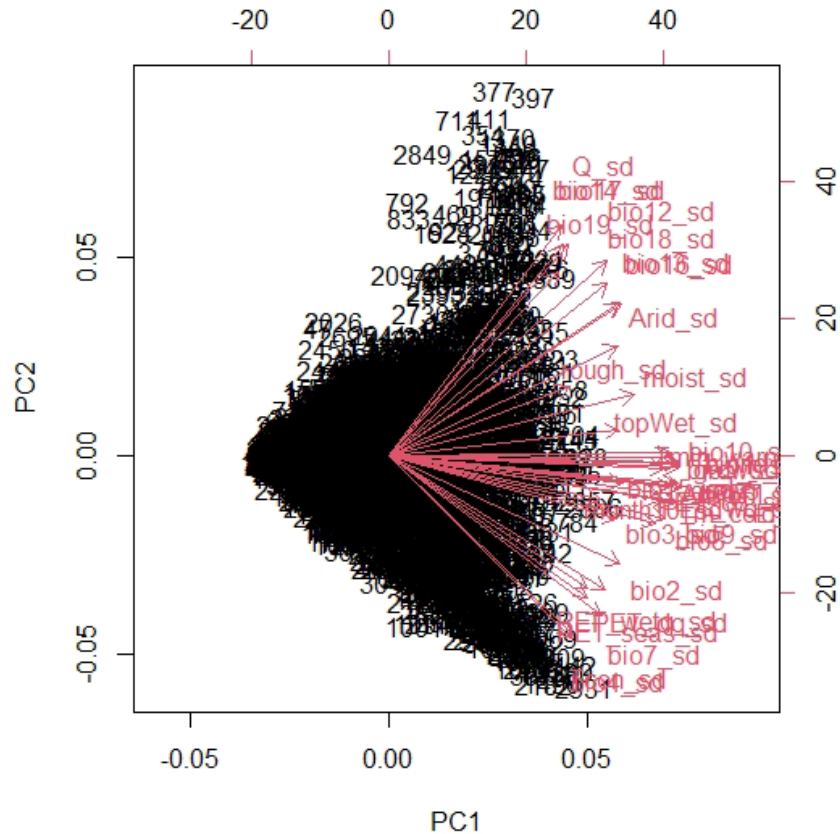

**Figure S2.** Biplot of WorldClim and ENVIREM climatic variables included in the climatic niche differentiation variable. The standard deviations of 37 climatic variables within 3056 species ranges were included in a principal component analysis (PCA). 1 point is 1 species range. PC1 aligns with all climatic variables, explaining a total of 63% of the overall variation. This means that if a standard deviation of for instance a temperature-based variable is high in a species range (i.e., a species experiences a variety of temperatures), also the standard deviations of other climatic variables increase in the same direction. And when the climatic standard deviations within a species range are high, the PC1 value for that species is also high. As it is expected that larger species ranges have more variable climates, PC1 was regressed against range size, taking the residuals of that relationship ( $r = 0.65$ ,  $t_{3054} = 47.45$ ,  $P < 0.001$ ) as value for disproportional climatic niche differentiation/uniformity.

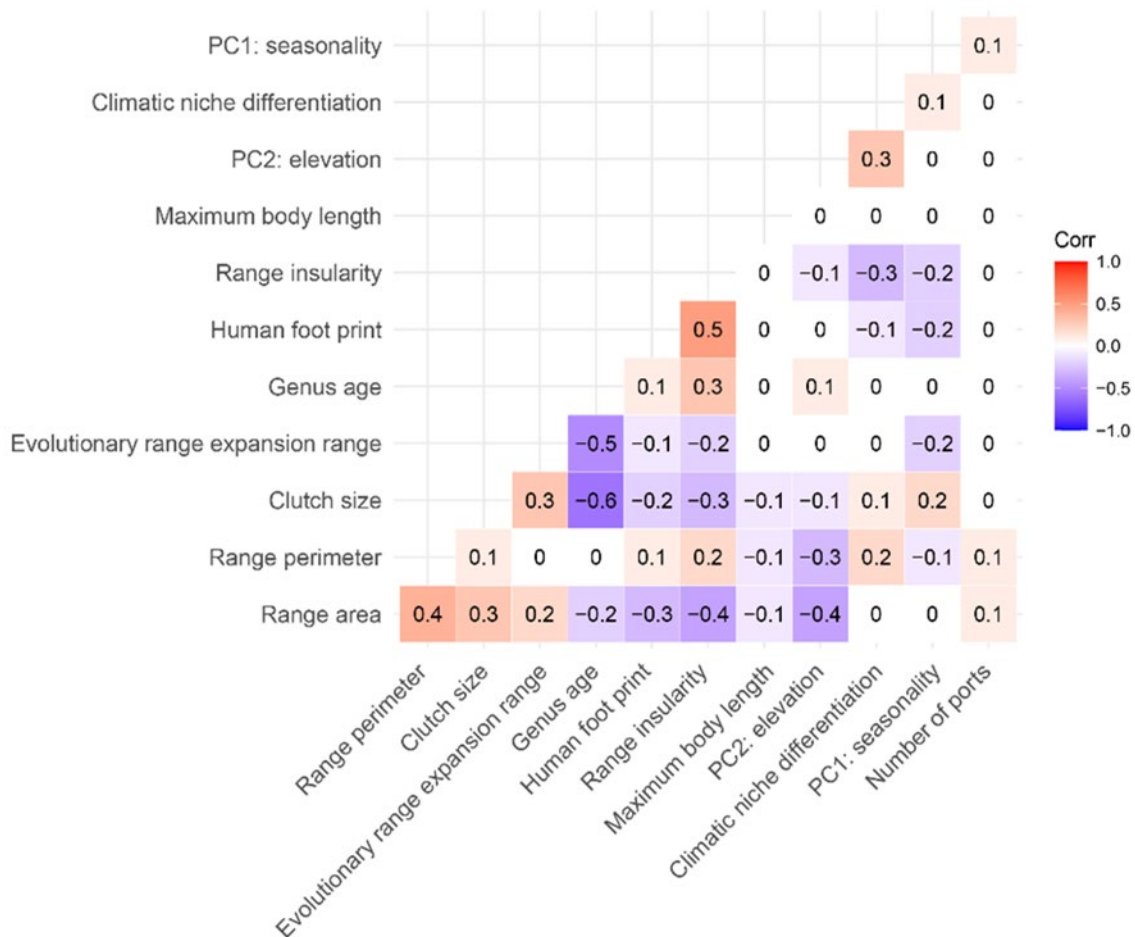

**Figure S3.** Correlations among predictor variables that were included in phylogenetic generalized linear models. Correlation matrix including all predictor variables. The brighter the color, the stronger the correlation between variables (i.e., closer to 1 or -1). Blue blocks indicate a negative relationship and red blocks indicate a positive relationship. The relatively low correlation coefficients among predictor variables indicate that there are no issues with collinear relationships that bias our model outputs (also indicated by a relatively low Variance Inflation Factor of <3, see main text)

**Table S2** Phylogenetic signal of predictor variables. Phylogenetic signal of discrete and continuous predictor variables. Phylogenetic signal is defined as Lamda ( $\lambda$ ), ranging between 0 and 1, the higher the value, the stronger the signal (“fitContinuous” and “fitDiscrete” functions in *geiger* R package). We expected phylogenetic signal for some variables: Clutch size, maximum body length, diet type, and reproductive mode were phylogenetically imputed (see Rapacciuolo et al. 2019 for details). Furthermore, two variables were genus-specific variables (stem age, evolutionary range expansion range), hence inherently phylogenetically clustered.

| <b>Variable type</b> | <b>Predictor variable</b>                | <b>Phylogenetic signal (<math>\lambda</math>)</b> |
|----------------------|------------------------------------------|---------------------------------------------------|
| <b>Geographic</b>    | <b>Range size</b>                        | 0.71816                                           |
| <b>Geographic</b>    | <b>Range shape</b>                       | 0.59037                                           |
| <b>Geographic</b>    | <b>Insularity</b>                        | 0.90954                                           |
| <b>Ecological</b>    | <b>PC1: seasonality</b>                  | 0.81980                                           |
| <b>Ecological</b>    | <b>PC2: elevation</b>                    | 0.70111                                           |
| <b>Ecological</b>    | <b>Climatic niche differentiation</b>    | 0.59214                                           |
| <b>Ecological</b>    | <b>Diet type</b>                         | 0.94790                                           |
| <b>Ecological</b>    | <b>Maximum body length</b>               | 0.51557                                           |
| <b>Ecological</b>    | <b>Clutch size</b>                       | 0.94050                                           |
| <b>Ecological</b>    | <b>Reproductive mode</b>                 | 0.98400                                           |
| <b>Evolutionary</b>  | <b>Genus age</b>                         | 1.00000                                           |
| <b>Evolutionary</b>  | <b>Evolutionary range expansion rate</b> | 1.00000                                           |
| <b>Anthropogenic</b> | <b>Human footprint</b>                   | 0.72552                                           |
| <b>Anthropogenic</b> | <b>Number of ports</b>                   | 0.00007                                           |
